## RESEARCH ARTICLE

# Tourist loyalty and mosque tourism: The case of the Mosque-Cathedral in Córdoba (Spain)

Virginia Navajas-Romero<sup>1☯✉</sup>, Ricardo David Hernández-Rojas<sup>2☯✉\*</sup>, Amalia Hidalgo-Fernández<sup>2☯‡</sup>, Juan Antonio Jimber del Rio<sup>2☯‡</sup>

**1** Department of Statistics, Econometrics, Operational Research, Business Organization and Applied Economics, University of Cordoba, Córdoba, Spain, **2** Department Agricultural Economics, Finance, and Accounting, University of Cordoba, Córdoba, Spain

☯ These authors contributed equally to this work.

✉ Current address: Avda. Medina Azahara, Córdoba, Spain

‡ These authors also contributed equally to this work.

\* [ricardo.hernandez@uco.es](mailto:ricardo.hernandez@uco.es)

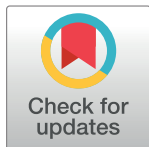

## Abstract

Loyalty is important in the tourism sector since tourists are the key to returning to a destination or recommending it, which is a determining factor in the management of tourist sites. The tourism of Mosques, is a contextualized tourism within religious and cultural tourism. This research aims to analyze the loyalty of tourists of Islamic origin in the Cathedral Mosque of Cordoba. Unlike previous studies, this research adopts a comprehensive approach by considering cultural factors in the analysis of loyalty of Islamic tourists in mosque tourism. The methodology used in this study was a structural equation model with a partial least squares (PLS) analysis. The sample is made up of 262 tourists of Islamic origin at Cordoba Cathedral Mosque. This model does not correspond to factors identified by the previous literature, which adopts an religious perspective of Islamic tourists in mosque tourism. The methodology used in this study was a structural equation model with a partial least squares (PLS) analysis. The sample is made up of 262 tourists of Islamic origin in Cordoba Cathedral Mosque. This model does not correspond to factors identified by the previous literature, which adopts an religious perspective.

## OPEN ACCESS

**Citation:** Navajas-Romero V, Hernández-Rojas RD, Hidalgo-Fernández A, Jimber del Rio JA (2020) Tourist loyalty and mosque tourism: The case of the Mosque-Cathedral in Córdoba (Spain). PLoS ONE 15(12): e0242866. <https://doi.org/10.1371/journal.pone.0242866>

**Editor:** Dejan Dragan, Univerza v Mariboru, SLOVENIA

**Received:** September 9, 2020

**Accepted:** November 10, 2020

**Published:** December 1, 2020

**Copyright:** © 2020 Navajas-Romero et al. This is an open access article distributed under the terms of the [Creative Commons Attribution License](https://creativecommons.org/licenses/by/4.0/), which permits unrestricted use, distribution, and reproduction in any medium, provided the original author and source are credited.

**Data Availability Statement:** All relevant data are within the paper and its [Supporting information](#) files.

**Funding:** The author(s) received no specific funding for this work.

**Competing interests:** The authors have declared that no competing interests exist.

## Introduction

In recent years the relationship of tourism with Islam has been the central point of academic research [1, 2]. Mosques are heritage sites which unify key factors in society, such as religion and culture, representing one of the most important and least studied multidisciplinary research fields of the decade [3]. Tourism at mosques is a very specialized type of cultural and religious tourism for Islamic heritage that is included in heritage tourism [4] and it relates to Arabic heritage in heritage tourism. Cultural tourism encompasses a relatively large number of tourists and is growing at an unprecedented pace (OMT, 2015). This type of tourism has gained importance in recent years [5], and tourism at mosques has been investigated previously [6]. In Europe, Spain is a destination for tourists interested in Islamic legacy [7, 8]. The increase in the number of Islamic tourists wishing to connect with their historical legacy is a growing opportunity for tourism in Europe and, consequently, appropriate marketing

strategies for this type of tourism have been proposed [5]. The Muslim travel market remains one of the fastest growing sectors in the world with an estimated 140 million Muslim visitors worldwide in 2018, compared to 131 million in 2017 [9]. Tourism at mosques has been recognized as a valid part of this growing market [10] and correct marketing is of great importance [7]. Muslim tourists have some characteristic demands [11] which make Islamic-Muslim tourism at destinations a challenge for tour operators [12].

Sharia Law defines the rules, guidelines and rituals that must be followed when one is a Muslim. Some people misunderstand Muslim communities and think that Islam means terrorist attacks or terrorist groups. These groups, while not being representative of Islam on the whole, are groups which fight for an Islamic State with a violent and extreme interpretation of Sharia law. The consequence of these actions has been the association of Islam with anti-Western violence and ideologies. Because of this, Muslims in certain areas are misjudged and even feared. This has a wide-ranging global impact on tourism and tourists of Muslim origin. In fact, Western tourists prefer to select non-Muslim destinations, while Muslim tourists prefer to travel regionally or resort to neighboring countries [13].

The Mosque-Cathedral in Cordoba is a unique heritage site for several reasons. Firstly, it represents the union of three cultures, Muslim, Jewish and Christian which cannot be seen at many other sites [14]. Secondly, the Mosque-Cathedral is recognized as the second most important temple in the Muslim world, with only the Mecca being more important [15]. Thirdly, the magnificent conservation work of the building [16] and finally as it is the second most visited heritage site in Spain and is included in the “World Heritage Cities” tours [17]. Building at the Mosque-Cathedral in Cordoba began in the year 786. It had continuous improvements during the different periods of the Caliphate of Cordoba. In 1238, after the Reconquest by the Castilian kings, it was consecrated as a cathedral, and in 1523 a Renaissance Plateresque style basilica was built inside the mosque. The mosque had some extensions added in the 16th century [18]. In addition, the Mosque-Cathedral makes Cordoba the first city to have four UNESCO World Heritage sites. In fact, the Mosque-Cathedral is one of the most visited cultural heritage sites, both in Cordoba and Spain. In 2019 it had 2,079,160 tourist visits, and an average growth of visits of 6.5% during the last 10 years (Observatorio de turismo de Córdoba, 2019). The loyalty of the tourist of Islamic origin is special to other types of tourists, the reason for agreement Wardi, Abror and Trinanda (2018) [19] is that for this type of tourism it is essential the implementation of halal and specialized marketing strategies as a key factor to loyalty to this client, since this client prioritizes these factors. Islamic tourists are well-ordered to follow Islamic schooling which directly and indirectly impact on their decision concerning tourism plan.

Satisfying customer needs is a high priority task for tour service providers and they have been seen to be making great efforts to meet the needs of their clientele [20]. Tourists are offered activities which encourage them to enjoy the history and culture of the destination [21]. Visiting a historic mosque may be for religious, cultural or even both reasons [22]. Consequently, studies on tourism at destinations with mosques include about the religious aspects [23, 24] and also about the cultural aspects [25, 26]. There are numerous studies that conclude that mosques are sacred sites which can offer a unique tourist experience [27]. It is therefore important for managers of heritage tourism to take advantage of tourist loyalty, satisfaction and expected value [28]. This study investigates these concepts in terms of the number of visits to the Mosque-Cathedral to help improve the management of tourism [29].

The American Customer Satisfaction Index is a proven and tested model which has been used in studies in the literature (ACSI) [30–33]. The model has a solid basis that can be successfully adapted to different areas in order to analyze the satisfaction and loyalty of the users of a product or service. Customer satisfaction is measured on a scale of 1 to 10, with 1 meaning

the customer is very dissatisfied and 10 very satisfied. Customer expectation is also measured on a 1 to 10 scale, with 1 meaning the product or service does not meet expectations and 10 meaning that it exceeds expectations. Quality control associations, research groups and universities from countries such as India, Saudi Arabia, Singapore, Dubai, Kuwait, South Africa, Honduras, Puerto Rico and Colombia implement quality control and satisfaction systems. The literature includes similar user satisfaction measurement systems such as "Swedish Customer Satisfaction Barometer" (SCSB) [34], "Norwegian Customer Satisfaction Barometer" (NCSB) [35], "European Customer Satisfaction Index" (ECSI) [36], "Hong Kong Customer Satisfaction Index" (HKCSI) [37]. The model has been used to measure customer loyalty in different areas, such as psychology [38], satisfaction with university studies [39] or rural development [40]. It has also been widely used to study the tourism sector [41, 42].

The aim of this article is to contribute to existing literature in two ways. Firstly, it presents an assessment of tourism at mosques, and then provides ideas for the administration and management of heritage sites and cultural tourism of Islamic origin. The information available about the complexity and diversity of tourism at Islamic heritage sites is refined with a theoretical model in a case study that analyzes the loyalty of tourists from groups with Islamic heritage. Misguided management and marketing decisions could promote negative aspects such as over-exploitation, creating hierarchies and misunderstandings [43]. On the other hand, this type of tourism also has strengths and opportunities for economic diversification and historical research, as well as the acceptance and dissemination of interculturality. The visitors' satisfaction and assessment of the perceived value of the Mosque-Cathedral and the destination are used to make useful recommendations to the different public and private bodies that are interested in promoting, disseminating and improving this type of tourism. The information is provided after analyzing how the different factors influence the management and promotion of cultural tourism. There are previous studies on Islamic tourists [44, 45], but few have investigated this topic in Spain [8] and none of them use the American Customer Satisfaction Index (ACSI). There are studies that link heritage and tourism with authenticity and loyalty at a destination [46], motivation and satisfaction [47], perceived value and loyalty [48], experience, satisfaction and tourist behavior [49] and satisfaction and loyalty [50]. However, there are no studies measuring satisfaction, perceived value and real value with loyalty to a heritage site and a mosque for the type of cultural tourists investigated in this document. Different approaches and views [51] have been presented in the literature for the management and administration of cultural assets from a cultural perspective. In order to properly manage and administer this type of tourism, fundamental factors such as the historical Islamic traditions and heritage of the monuments must be taken into account, and in this way tourist loyalty may be increased. This project contributes to the literature on the management and administration of heritage sites by using the opinions and criteria of the community that built and managed the site in the past. Taking these points into consideration can help to establish and improve management models that achieve the highest levels of loyalty for a historical Islamic heritage site. The following research question is the result of these points—Do the tourist activities available at the Mosque-Cathedral make tourists of Islamic origin feel loyal to the site due to the perceived quality, satisfaction and loyalty as defined in the ACSI model?

## Literature review

### Islamic tourism at mosques

Islamic tourism is generally perceived as a type of tourism encompassing Islam and/or Muslim travelers. Islamic tourism describes Muslim tourists traveling to religious destinations (Organization of the Islamic Conference, 2008). Islam is often perceived as a strict religion which

imposes many rules, but it is important to realize that Islam and tourism are compatible. In fact, Islam promotes tourism by mentioning it in several chapters of the Qur'aan (Surah) as a tool for acquiring knowledge. This is why acts of Hajj (pilgrimage to Mecca), Umrah (pilgrimage to Mecca and Medina) and Ziyarat (other religiously motivated trips to mosques, tombs, caves or battlefields) are very important in Islam [52]. The creation of products which respond to the needs of Muslim communities is a key task which involves tangible and intangible elements [53].

There are authors who identify tourism at mosques as an important part of Islamic tourism [54] and as an important type of emerging tourism [55]. In the Muslim religion, mosques are the house of God or places of worship [56]. In fact, the term mosque means prostrate and a mosque is a place where Muslims kneel [57], and are mainly used for congregational prayers. These buildings are a direct manifestation of Islam and portray Muslim identity [58], representing Islam and its dissemination [59]. In addition, in the Muslim way of life, mosques play important roles in society [58] beyond purely religious ones, such as holding educational, political and community events Aziz, Rahman [59].

Mosque tourism is part of religious tourism and managers and policy makers are showing interest in the promotion of mosques as tourist attractions [60]. In fact, the Mosque-Cathedral of Cordoba was among the top ten destinations for tourists visiting this country in 2017 [61]. Mosques are heritage sites and, as such, are a touristic resource [62]. Overall, academic literature on mosque tourism is very scarce. Studies about this type of tourism are varied, and investigate different areas such as, employment [63], documentation [64], or the management of Muslim heritage [65]. Studies about mosques in Spain have investigated the historical and archaeological aspects, as well as their artistic relevance [66]. Fernández & Ortiz-Cordero, (2020) [67] investigated the arrangement of the columns in the Mosque-Cathedral of Cordoba. Other studies indicate that the Mosque-Cathedral has wonderful acoustics [68] and illumination [69], while others present theories on why the mosque was built [70]. According to Benur & Bramwell (2015) [71], tourist products are being offered in Spain that meets the demands of Muslim tourists [29]. It shows that halal tourism is becoming popular and is growing in countries such as the United Kingdom, Canada, Indonesia and Spain [7, 72, 73].

### **Theoretical foundation: Expected and perceived quality, satisfaction and loyalty**

The literature on the subject contains studies about the relationships which can exist between a customer and a place or business. The studies show that the customer evaluates and values different aspects of the interaction they have with the place or business and there are different factors which are taken into consideration in the resulting relationship [74, 75]. The customer evaluates many elements of the overall management, which is shown to be important as there is no single factor that independently determines the value a customer gives to a place or business [76]. Analyzing the marketing of the products or services offered by a company is also important as relationships with customers are established and maintained and these relationships can subsequently influence positive results for the company, such as word of mouth promotion and increased sales [76]. Using the literature about the theory of commitment or loyalty, the most important factors in the relationship of the Muslim tourist and a place or business are the expected quality [77], perceived quality [78], satisfaction [79] and motivation [80].

Studies have shown that loyalty to a place is directly related to visitor satisfaction and opinion [81]. Studies analyzing loyalty to a heritage have mainly examined the attitude and intention of the visitor [82]. Studies investigating loyalty to cultural heritage are primarily cognitive and use structural equations to predict destination loyalty [83, 84]. This type of academic

studies investigating loyalty can be grouped into two categories, firstly, those which investigate repeated purchases, i.e. tourists returning to a destination, and secondly those which consider loyalty to mean recommending a tourist destination to other future tourists [85–87]. Therefore, tourists can feel connected to a destination, and intend to visit it again in the future and recommend it to third parties [88–90]. However, there are other studies that show that a tourist's desire for new experiences can counteract how loyal a visitor feels to a place [91].

Aspects such as the comfort experienced by the tourist at the destination and, especially, at the monument visited is one of the most important factors to predict whether a visitor will return to a destination and, therefore, for loyalty [84, 87, 90]. Perceived quality is often considered one of the most important factors of loyalty [92]. Perceived quality is defined as the general accumulation of all the tourist's feelings about their experience at a destination [93, 94]. The importance of perceived quality is related to its relationship with customer satisfaction [95, 96]. Tourists assess their experience as positive or negative based on the attributes of the monument or destination [97]. As both variables above, perceived quality and customer satisfaction, are positively related the probability that a visitor repeats or recommends the destination is high if they give a positive assessment. This relationship is confirmed in numerous academic studies [20, 98–101]. In the proposed model, perceived quality directly influences loyalty and is mediated through satisfaction [84, 102, 103].

H1: The expectations of the Islamic tourist at the Mosque-Cathedral have a significant and positive relationship with the satisfaction of the visit to the Mosque-Cathedral.

H5: The expectations of the Islamic tourist at the Mosque-Cathedral have a significant and positive relationship with expectations and loyalty (mediated).

Following this idea, Escamilla Santamaría [104] y Duque-Oliva and Rodríguez-Romero [105] together with Fernandez Neto [106] state that loyalty to destinations is influenced by the perceived quality i.e. the feelings a tourist has about a place before they go compared to their feelings about it when there. Kim [107] claimed that the preconceived image of a destination is one of the main factors when attracting visitors, so expectations both from the point of view of creating and promoting places by managers and fulfilling expectations is a difficult task that must be well thought out and prepared to achieve the satisfaction of the tourist. Veasna, Wu [108] o Assaker, Vinzi [109] claim that expectations are precisely one of the critical factors to be considered for visitor satisfaction. In the proposed model loyalty was investigated based on expectations using a mediated variable such as satisfaction [80, 110]. This variable is useful for managers when promoting a destination and can be used to manage a site, as it influences whether a visitor will return to a place or recommend it to others.

H2: The quality of the experience of the Islamic tourist at the Mosque-Cathedral has a significant and positive relationship with loyalty to the Mosque-Cathedral.

H3: The quality of the experience of the Islamic tourist at the Mosque-Cathedral has a significant and positive relationship with the satisfaction of the Islamic tourist's visit to the Mosque-Cathedral.

H6: The quality of the experience of the Islamic tourist at the Mosque-Cathedral has a significant and positive relationship with loyalty. (mediated).

Satisfaction can be defined as the overall assessment of the service received by tourists compared to the ideas they had about what they expected to receive [111]. This definition is based primarily on the cognitive dimension of satisfaction, but it should be noted that there is also an emotional component involved [112]. Satisfaction is a customer's evaluation made after receiving a product or service, and shows the relationship between expectations and perception.

H4: The satisfaction of the Islamic tourist at the Mosque-Cathedral has a significant and positive relationship with loyalty to visiting the Mosque-Cathedral.

## Materials and methods

The loyalty of customers is an important aspect to consider because it is directly related to the profitability of products and services [113]. It includes variables that have an impact on the intention of Muslim tourists to visit a cultural heritage site and recommend it to others. To this end, expectations (EXP), loyalty (LOY), satisfaction (SAT) and expected quality (QUA) are analyzed individually. The proposed model for this study uses four variables to measure the loyalty of Islamic tourists to mosques, in particular the Mosque-Cathedral of Cordoba, 1) The perceived quality of the tourist experience at the Mosque-Cathedral. Giving a value to this variable implies that the visit was recent, 2) Expected quality measures what the customer expected to obtain from the visit. The value given to this variable represents any past experience at a mosque [30], 3) Customer satisfaction is a measure that takes into account the number of people who say they will repeat their visit or recommend the destination to others.

The hypotheses used in the empirical investigation are given below. The main objective of this study was to identify the factors that significantly influence the loyalty of Muslim tourists who visit cities with mosques by analyzing six hypotheses formulated from the existing literature. The hypotheses used in this study are listed below:

- H1. The expectations of the Islamic tourist at the Mosque-Cathedral have a significant and positive relationship with the satisfaction of the visit to the Mosque-Cathedral.
- H2. The quality of the experience of the Islamic tourist at the Mosque-Cathedral has a significant and positive relationship with loyalty to the Mosque-Cathedral.
- H3. The quality of the experience of the Islamic tourist at the Mosque-Cathedral has a significant and positive relationship with the satisfaction of the Islamic tourist's visit to the Mosque-Cathedral.
- H4. The satisfaction of the Islamic tourist at the Mosque-Cathedral has a significant and positive relationship with loyalty to visiting the Mosque-Cathedral.
- H5. The expectations of the Islamic tourist at the Mosque-Cathedral have a significant and positive relationship with expectations and loyalty (mediated).
- H6. The quality of the experience of the Islamic tourist at the Mosque-Cathedral has a significant and positive relationship with loyalty. (mediated).

## Methodology

### Description of the Mosque-Cathedral in Córdoba

The investigation was carried out in Córdoba, which is part of the autonomous community of Andalusia in southern Spain. It is an inland city which is well connected to the rest of the country by means of roads and high-speed trains. It is attractive to tourists due to its wealth of cultural heritage (World Heritage Cities of Spain, 2017). The Mosque-Cathedral, where the field work was carried out, has two distinct areas. The first is the courtyard, where the current bell tower and the prayer room are located. The latter stands out because of the myriad of columns and bi-colored arcades. The second area is the interior of the mosque-cathedral, which is divided into five zones that show the five enlargements carried out over the centuries.

### Questionnaire and scales

The information was collected using a questionnaire together with a personal interview with each tourist of Islamic origin after their visit to the Mosque-Cathedral. The questionnaire was

prepared in December 2019. The validation of the survey and the construction of the questions is based on consolidated indicators from previous research [114, 115]. Once the indicators had been obtained, a two-stage refining process was used. First, the indicators proposed by an investigator were analyzed, then the final survey was tested and verified by a manager at the Mosque-Cathedral. This meant that the validity of the indicators in the constructs of the proposed research model were checked twice.

The access by the surveyors to the Mosque-Cathedral heritage and the conduct of interviews with tourists was authorized by the managing body and owner of the Mosque-Cathedral (Cabildo Mosque-Cathedral of Córdoba). Prior to the completion of the questionnaire, tourists were informed of academic purposes and anonymity in answering. Consent to take the questionnaire was verbal. At all times, the visitor's anonymity to the Mosque-Cathedral was guaranteed.

The questionnaire was organized into six sections. The first section included questions about the tourist's demographic profile. The following sections asked about the expectations the tourists had for the destination, the quality of the destination, their general experience and their loyalty, which means their intention to return or recommend a visit to the city and/or the Mosque-Cathedral. The different variables were measured on a 5-point Likert scale, where 1 means totally disagree and 5 means totally agree. The previously tested questions from other studies, as shown in Table 1, were adapted and used in this investigation.

In a second phase the survey was made in English and Spanish. Before starting the questionnaire, the pollster asked the tourist for their cooperation and provided information about the objectives of the investigation. The tourist of Islamic origin completed the survey anonymously with complete autonomy. Indicators about the sociodemographic profile were included at the end of the survey. The questionnaire contained 32 indicators, which were the result of debugging indicators after calculating the value of the Cronbach's Alpha coefficient for each construct. The fieldwork was carried out during the month of December 2019, with a simple random sampling of visitors to the Mosque-Cathedral. A pretest of 20 surveys was conducted. In total, the number of valid questionnaires was 262, obtaining a 95% confidence level. The target population of the study is 2,079,160 tourists who visited the Cathedral Mosque in 2019. With a sampling error of 6% and a confidence interval of 95%, we obtain a finite representative sample for the

**Table 1. Scales used.**

| Authors         | Variable                  | Indicators                                                                                                                                                                                                                                                                                                                                                                                               |
|-----------------|---------------------------|----------------------------------------------------------------------------------------------------------------------------------------------------------------------------------------------------------------------------------------------------------------------------------------------------------------------------------------------------------------------------------------------------------|
| [60, 116, 117]  | Expectations (EXP)        | (EXP1) Conservation of the Mosque-Cathedral. (EXP2) Conservation and cleanliness of the city. (EXP3) Conservation and cleanliness of the Mosque-Cathedral. (EXP4) Transport to the city.                                                                                                                                                                                                                 |
| [98–120]        | Satisfaction (SAT)        | (SAT1) The visit to the Mosque-Cathedral was satisfactory. (SAT2) The visit to the Mosque-Cathedral met my expectations. (SAT3) The conduct of the staff at the Mosque-Cathedral was satisfactory. (SAT4) The cultural heritage of the monument was better than expected. (SAT5) The visit to the Mosque-Cathedral is worth the entrance fee. (SAT6) My experience at the Mosque-Cathedral was positive. |
| [80, 108–110]   | Loyalty (LOY)             | (LOY1) I would recommend visiting the city of Córdoba to my family and friends. (LOY2) I would recommend visiting the Mosque-Cathedral to family and friends.                                                                                                                                                                                                                                            |
| [102, 103, 121] | Destination Quality (QUA) | (QU1) Prestige of the city. (QU2) Prestige of the Mosque-Cathedral. (QU3) Conservation of the Mosque-Cathedral. (QU4) Conservation and cleanliness of the city.                                                                                                                                                                                                                                          |

Source: Author.

<https://doi.org/10.1371/journal.pone.0242866.t001>

population of the entire year 2019 of 262 questionnaires. 270 questionnaires were carried out, 8 of which were discarded due to errors in completion (Table 2).

From the indications in the work of Nunnally and Bernstein (1994), [122] the value of Cronbach's alpha for all the indicators was calculated. The value obtained, 0.913, was acceptable, because a value of 0.7 or above is considered acceptable. The data obtained was tabulated and analyzed using the IBM SPSS 23 statistical system (IBM Corporation, Armonk, NY, USA) and the Smart-PLS (Partial Least Squares) structural equation computer package. The literature review showed that the SEM method is considered the most appropriate way to validate the hypotheses proposed in the structural equations and confirm the model of complex relationships. The Smart PLS 3.2.9 program [123], for modeling structural equations with minimum partial squares (PLS-SEM) was used as a tool for the analysis of complex interrelationships between observed and latent variables. This method has been widely used and validated for scientific research in the tourism sector [124].

## Results and discussion

The main findings for each of the variables in the questionnaire are described below. The sociodemographic results were used to define the profile of the tourists surveyed during their visit to Cordoba (see Table 3). Secondly, the reliability and validity of the proposed model are studied, and finally, the hypotheses are analyzed.

The sociodemographic profile of the tourists visiting the Mosque-Cathedral is shown in Table 3 and it can be seen that 54% of the interviewed tourists were women and 46% were men. The surveys were mainly answered by people under 25 years old (30%) with university studies (41.4%).

### Reliability and validity of the model

This model shows the theoretical relationships between the research elements. The model was analyzed to find the validity and reliability of the constructs and which are reflective and which formative. The results obtained show that the observed variables measure the theoretical constructs proposed above [125].

The validity and reliability of the construct measurements were then checked before investigating the relationships between them [126]. The constructs in the model were evaluated following the recommendations in the literature [124]. After the evaluation, loyalty was found to be a formative indicator in the proposed model, using the guidelines of Henseler [127]. According to other authors [128, 129], the multicollinearity between the different indicators that make up formative constructs must be checked. The tests for convergent validity were found to be positive after analyzing the redundancy of these constructs [130]. The collinearity was then assessed by calculating the variance inflation factor (VIF) which was found to be less than 5. A value of 5 or less indicates the non-existence of high multicollinearity [131], even

**Table 2. Calculation of sample size.**

|                     |              |          |
|---------------------|--------------|----------|
| <b>Population</b>   | 2.079.160,00 |          |
| <b>Error:</b>       |              | 6%       |
| <b>Confidence:</b>  |              | 95%      |
| <b>Sample size:</b> | 262,76       | Infinite |
| <b>Sample size:</b> | 262          | Finite   |

Source: Author.

<https://doi.org/10.1371/journal.pone.0242866.t002>



Table 3. Sociodemographic profile of the respondents.

| Variable                          | Categories | Absolute Frequency | Percentage |
|-----------------------------------|------------|--------------------|------------|
| <b>Sex (n = 262)</b>              |            |                    |            |
|                                   | Men        | 121                | 46         |
|                                   | Women      | 141                | 54         |
| <b>Age (n = 262)</b>              |            |                    |            |
|                                   | [Under 25] | 79                 | 30         |
|                                   | [26–39]    | 69                 | 26,2       |
|                                   | [40–59]    | 32                 | 12,2       |
|                                   | 60 or more | 82                 | 31,6       |
| <b>Level of Studies (n = 262)</b> |            |                    |            |
|                                   | Basic      | 20                 | 7,6        |
|                                   | Secondary  | 40                 | 15,2       |
|                                   | University | 108                | 41,4       |
| <b>Professional Training</b>      |            |                    |            |
|                                   | Dk/Da      | 33                 | 12,5       |
|                                   | Others     | 10                 | 3,8        |

Source: Author.

<https://doi.org/10.1371/journal.pone.0242866.t003>

though other authors, such as [132] indicate that a value of VIF greater than 3.3 indicates that there is high multicollinearity. The indicators of the formative constructs were evaluated by weighting, and were found to be significant [124] as shown in Table 4. The resulting values in Table 3 show the absence of collinearity in the variables that make up the loyalty construct.

In order to evaluate the reflective constructions or B mode of the model (Satisfaction, Expectations and Quality) the individual reliability of the indicators, the internal consistency of the construct, the convergent validity and the discriminant validity of the reflective constructs were all calculated [125]. The results indicated adequate individual reliability, as all load values were above the required minimum threshold of 0.505 [133] or 0,6 [126]. In fact, the analysis revealed that the loads were statistically significant with a value of 99.99%. The discriminatory validity was also verified, as the correlations between constructions were less than the square root of the average variance extracted [130]. The results of these measurements showed that the measurement model could be considered valid and reliable. The following the structural model analysis could then be carried out.

**Composite reliability (Pc).** The individual reliability of the constructs allows us to check whether the indicators actually measure the constructs. The results in Table 5 indicate that all the constructs are reliable, as their composite or joint reliability is  $> 0.7$ . These values are considered "satisfactory to good" because they are between 0.70 and 0.95 [134]. The composite reliability index is similar to Cronbach's alpha, with the difference that composite reliability is not influenced by the number of indicators on the scale. Following Hair et al. (2012) [125] the

Table 4. Reliability of individual indicators (formative).

| Construct                | Weighting | Collinearity |
|--------------------------|-----------|--------------|
| <b>Actitud ambiental</b> |           |              |
| LOY1                     | 0,491     | 1,601        |
| LOY4                     | 0,621     | 1,601        |

Source: Author.

<https://doi.org/10.1371/journal.pone.0242866.t004>

**Table 5. Individual reliability of the indicators (reflective).**

| Variable | Load  |
|----------|-------|
| QU1      | 0,740 |
| QU2      | 0,738 |
| QU3      | 0,700 |
| QU4      | 0,557 |
| EXP1     | 0,740 |
| EXP2     | 0,771 |
| EXP3     | 0,713 |
| EXP4     | 0,698 |
| SAT1     | 0,841 |
| SAT2     | 0,786 |
| SAT3     | 0,729 |
| SAT4     | 0,708 |
| SAT5     | 0,733 |
| SAT6     | 0,786 |

Source: Author.

<https://doi.org/10.1371/journal.pone.0242866.t005>

accepted level of composite reliability is 0.7, with 0.8 being a stricter minimal level. In our study, composite reliability can be observed in Table 6. The strictest level of 0.8 is exceeded in three composite reliability indicators (satisfaction, expectations and quality). These values therefore validate the internal consistency of the model. The construct of loyalty as a formative indicator does not have any composite reliability, as formative indicators do not co-vary.

**Convergent validity.** The convergent validity is used to find the degree to which the indicators measure the related construct. The most common measurement for evaluating convergent validity in PLS-SEM is the average variance extracted, AVE. Using the same theory as for individual indicators, a value for AVE of 50% or more means that, on average, the construct explains more than half of the variance of its own indicator [123, 124, 133, 135]. Table 7 shows the values of AVE for the constructs, all of which have a value greater than 0.5, and so meet the necessary criteria.

The convergent validity is used to find the degree to which the indicators measure the related construct. The most common measurement for evaluating convergent validity in PLS-SEM is the average variance extracted, AVE. Using the same theory as for individual indicators, a value for AVE of 50% or more means that, on average, the construct explains more than half of the variance of its own indicator [123, 124, 133, 135]. Table 7 shows the values of AVE for the constructs, all of which have a value greater than 0.5, and so meet the necessary criteria [133].

**Discriminant validity.** This value shows the extent to which one construct is different from the others. In order to be in an acceptable range, the values present on the diagonal must

**Table 6. Composite reliability.**

| Construct | Composite Reliability |
|-----------|-----------------------|
| LOY       | n/a                   |
| SAT       | 0,894                 |
| EXP       | 0,821                 |
| CAL       | 0,802                 |

Source: Author.

<https://doi.org/10.1371/journal.pone.0242866.t006>

**Table 7. Average variance extracted.**

| Construct |              | Average Variance Extracted (AVE) |
|-----------|--------------|----------------------------------|
| LOY       | Loyalty      | n/a                              |
| SAT       | Satisfaction | 0,586                            |
| EXP       | Experience   | 0,535                            |
| QUAL      | Quality      | 0,504                            |

Source: Author.

<https://doi.org/10.1371/journal.pone.0242866.t007>

be significantly higher than those found in the rows and columns. The values of discriminant validity in this study are shown in [Table 8](#). All the values meet the requirements stated above. It must be noted that since the construct with formative indicators has no AVE, it does not have discriminant validity.

## Verification of the hypotheses

### Explained variance ( $R^2$ )

Once the sample measurement model had been validated, the internal model was evaluated. This was done to verify the proposed assumptions for the relationships between constructs. To do this, the value of  $R^2$  was calculated so that the importance of the relationships could be analyzed [125]. The explained variance of endogenous constructions was found by analyzing the calculated values for  $R^2$  and thus, the predictive power of the model could be found [133].

### Bootstrapping

The significance of path coefficients was found using the t-distribution of Student with 499 degrees of freedom ( $n-1$ , where  $n$  represents the number of subsamples). The values for the significance were found to be 0.007, 0.000 and 0.010. [Table 9](#) shows the relationship studied, the effect that the relationship has, the Path Coefficient, the t-value and whether or not the relationship is supported. It can therefore be seen that there are three supported hypotheses (H3, H4, H6) and three unsupported ones (H1, H2, H5).

The hypothesis H3 (there is a positive relationship between the quality and satisfaction of tourists), hypothesis H4 (there is a positive relationship between satisfaction and loyalty) and hypothesis H6 (there is a positive relationship between quality and loyalty) were all supported. However, hypothesis H1 (customer expectations influence visitor satisfaction), hypothesis H2 (quality influences the loyalty of tourists) and hypothesis H5 (expectations influence loyalty) were not supported in this study. [Fig 1](#) shows the causal relationships of the proposed model.

**Table 8. Discriminant validity.**

|     | EXP   | LOY   | QUA   | SAT   |
|-----|-------|-------|-------|-------|
| LOY | n/a   |       |       |       |
| EXP | 0,732 | n/a   |       |       |
| QUA | 0,876 | 0,653 | 0,710 |       |
| SAT | 0,750 | 0,776 | 0,804 | 0,765 |

Source: Author.

<https://doi.org/10.1371/journal.pone.0242866.t008>

**Table 9. Hypotheses verification.**

| Hypothesis       | Effect | Path Coefficient | t-Value | p-Value | ¿Supported? |
|------------------|--------|------------------|---------|---------|-------------|
| H1: EXP with SAT | +      | 0,199            | 0,817   | 0,414   | NO          |
| H2: QUA with LOY | +      | 0,083            | 0,633   | 0,527   | NO          |
| H3: QUA with SAT | +      | 0,629            | 2,709   | 0,007   | Si          |
| H4: SAT with LOY | +      | 0,710            | 5,714   | 0,000   | Si          |
| H5: EXP with LOY |        | 0,141            | 0,828   | 0,408   | NO          |
| H6: QUA with LOY |        | 0,447            | 2,581   | 0,010   | SI          |

a = 0,001 (\*\*\*) ; a = 0,01 (\*\*) ; a = 0,05 (\*) ; n.s. = not supported

Source: Author.

<https://doi.org/10.1371/journal.pone.0242866.t009>

### Discussion

This study was motivated by the growing importance of tourist loyalty to places visited. In this study the loyalty of Islamic tourists at the Mosque-Cathedral of Cordoba was investigated. The most important aspects for increasing the loyalty of the Islamic tourist at the Mosque-Cathedral were investigated. Córdoba is a city where different cultures have passed and coexisted and the Mosque-Cathedral can be considered as one of the most unique and exceptional monuments in the world. The Mosque-Cathedral is currently one of the heritage sites with the highest number of visits in Spain, surpassing 2 million visits in 2019, with a continuous, average growth of 6.5%. The improvement and increase in the offers of the Mosque-Cathedral, such as the night-time visit ‘Alma de Córdoba’ and the recognition of the value of the Torre Campanario in 2017, have improved the tourist experience and resulted in an increase in overnight stays in the city. It is an example of responsible and sustainable management with the clear aim of growth. These factors, together with the high levels of quality and satisfaction found in this study make it the place with the highest tourist loyalty in the city. All these aspects can be used by managers of historical heritage to make sustainable tourist offers which allow for growth. The opinions of Islamic tourists about their visit helped to identify the factors that

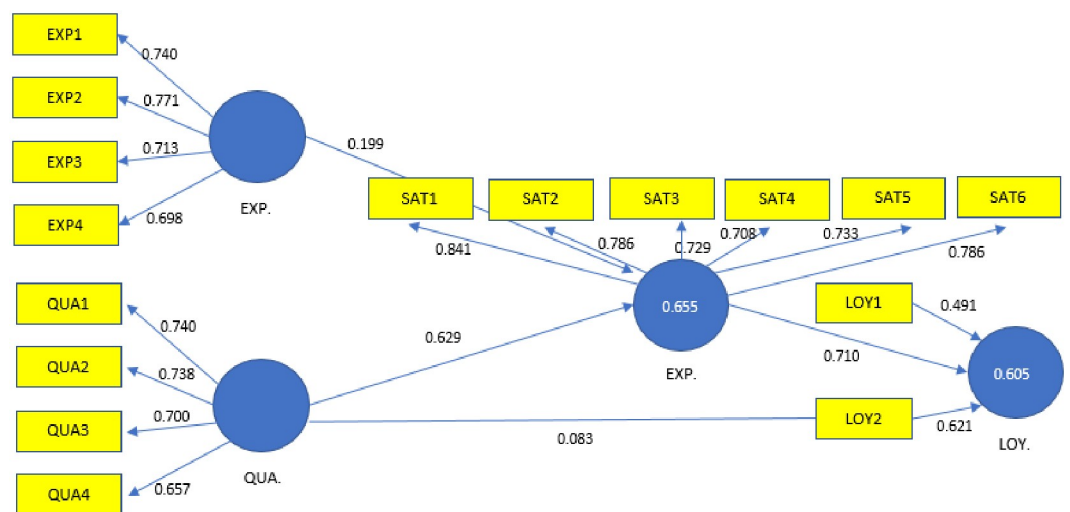

**Fig 1. Causal relationships of the proposed model.**

<https://doi.org/10.1371/journal.pone.0242866.g001>

influence loyalty, such as satisfaction, quality and expectations in order to identify which were most decisive for the study. Managers responsible for planning and managing important tourist destinations for Islamic tourists can use these factors to increase tourist loyalty and can take appropriate measures implement them. Tourists who are loyal also have high expectations for the quality of the service provided, are satisfied with high quality service and the tourist experience. These tourists will recommend the destination to third parties and intend to repeat their visit. It is advisable to create personalized marketing strategies to ensure the loyalty of this type of tourist [136].

The ACSI model was used in this study to investigate the loyalty of tourists visiting mosques, which could play an important role in the future of the cultural tourism experience in Spain. A structural equation was proposed, that was used to study the loyalty of this type of tourists due to the quality and satisfaction the tourists felt with their visit to the Senarath site [137] Tourists visiting mosques have special characteristics which must be taken into account when managing heritage sites [138]. This means that the heritage sites that this type of tourists visit should read and use academic studies for the organization and management of the site, as well as for planning tourism at the site. As a result of the problems arising from the mismanagement of heritage sites, group identity can be lost and stereotypes can be created [33, 139] which can have negative effects on tourism at the site.

According hypothesis 3, there is a significant and positive relationship between quality and satisfaction. A high level of expected quality is expected to have a positive effect on the value given by tourists to perceived quality [108, 109]. Expected and perceived quality are the basic requirements for any successful tourist destination. The local community plays an important role in the feelings of tourists at a destination. According hypothesis 2, the quality of service gives a value to the experience and feelings of the tourist. This aspect may influence the tourist's intention to revisit or recommend a destination or heritage site. The perceived quality index value (87.89%) exceeded the expectations index value (86.19%) of the tourists in this study. This is consistent with results from other studies in the field of tourism [119, 140]. According hypothesis 3, it has been shown that trust and quality of service have a positive and significant effect on customer satisfaction and that, in turn, satisfaction has a positive influence on customer loyalty (hypothesis 4) [115, 116]. There are studies which confirm this relationship for the Islamic collective in Malaysia [141] for areas of tourism such as heritage, halal, alcohol, free gambling and Islamic morality [142]. These outcomes are in line with other studies that analyze consumer behavior and culture [116]. In recent years, managers at the Mosque-Cathedral have been concerned about improving the quality of the tourist experience at this historical heritage site. This can be seen by the reforms made and the new tourism products available at the Mosque-Cathedral. There is also a significant and positive relationship between satisfaction and loyalty (hypothesis 4). According to the results achieved in other studies [20, 97, 101] found that positive feelings about satisfaction, quality and expectations positively influenced intentions to return to or recommend a destination (Hypothesis 5,6). These results are a practical goal for managers to improve the experience of the Islamic tourists visiting the Mosque-Cathedral. This means that satisfaction with the tourist visit becomes one of the reasons for visiting the heritage site. Similarly, and in line with previous work [98, 143] results indicate that satisfaction has a positive influence on loyalty to the destination, which encourages tourists to return to the destination in the future, and to recommend it once they return home. In addition, there is a significant and positive mediated relationship between quality and loyalty. This confirms other studies [144, 145]. In the case of the Mosque-Cathedral improving the quality felt by tourists at the site can also improve the quality and satisfaction felt with the tourist destination.

The main reason why hypotheses 2, 3 and 5 have not been fully fulfilled is based on the idiosyncrasies of this type of tourism itself. The results obtained coincide with studies that analyze

this type of tourism and its relationship with the factors analyzed. Following this idea, the motivation of the tourist can influence the results related to satisfaction and loyalty. When the motivation of the visit is based on religious factors both the expectations and the quality expected of the visit go to the background (Idris, 2019; Piva et al, 2019) since the essential thing for the tourist with religious motivations is the visit itself to the place of worship altering the results of our hypotheses.

## Conclusion and limitations

The results show that tourists appreciate different parts of their experience, some of which are, the explanations given by the guides, the conservation of the heritage site, and the care and maintenance of the surrounding areas. The Mosque-Cathedral in Cordoba therefore unites and links the tourist with the destination, positively influencing loyalty to the city. The quality attributed to this heritage site, linked to the perceived quality of the visit is a positive attribute for those travelers who want to know the local culture [110, 146].

Studies which investigate the loyalty of Islamic tourists at heritage sites is scarce [147, 148]. However, the analysis of mosque tourism is becoming important [6, 149]. This study has important theoretical and practical implications for the management of Islamic tourism at heritage sites. First, measuring the loyalty of Islamic tourists is a critical step in designing and implementing practices that improve loyalty. In order to promote the tourist loyalty of this type of tourist, the agents involved must take into account the expectations of the tourists who visit the site, the perceived level of quality of the service, the satisfaction of the visitors and their intention to recommend the destination and repeat the visit. Studying this type of tourist means that the results can be used to prepare specialist marketing strategies for them [150]. Personalized programs for Islamic tourists can be organized, so that stable long-term relationships are established which are interesting for this type of tourist so that their satisfaction with the visit is increased. These are special customers for which personal relationships must be developed. Understanding how the ACSI model works with cultural tourism can contribute to improving the loyalty of Islamic tourism. From a practical point of view, the results corroborate the idea that the correct management of the heritage site can influence the feelings of the Islamic tourist, which increases their loyalty to the site and affects the recommendations they make. This means that the tourism sector should take these factors into account to improve tourism loyalty. Policymakers should explore new management methods to give this type of tourist a memorable experience when they visit heritage sites. The management of information, the preservation of the site, its prestige and the safety felt when visiting are all important points to consider. To avoid possible disagreements, the management of these heritage sites should pay particular attention to Islamic identity and its relationship to the site, including the religious and institutional orientation. Another possible area of conflict could be non-Islamic interest in mosques, because public authorities, operators and tourists themselves may have no special interest in Islamic heritage. The local tourist board has a new system which promotes this type of tourism, which can be considered a tourist niche [129, 130] in order to support a multicultural and cosmopolitan city. Local government and private companies which are responsible for the management of the Mosque-Cathedral should work together to improve the tourism experience [129–131]. Specialist communication tools can play a key role as marketing strategies to attract this type of tourism.

This research has potential limitations, the first of which is the sample used. The data was only obtained from tourists in the Mosque-Cathedral in Cordoba, which could indicate that the collected data is only applicable to one unique tourist site. Another improvement could be a longitudinal study that records the feelings of tourists over time, allowing measurement of

variables in a more precise way. Also, although measuring behavioral loyalty has been used in several studies, it is a subjective measure of tourist behavior and does not always correspond to tourists' real behavior [132]. Future lines of research could include other internal and external variables, as well as studying of the relationships between destiny, heritage and loyalty.

## Supporting information

### S1 Data.

(XLSX)

## Author Contributions

**Conceptualization:** Virginia Navajas-Romero, Ricardo David Hernández-Rojas, Amalia Hidalgo-Fernández.

**Data curation:** Juan Antonio Jimber del Rio.

**Formal analysis:** Juan Antonio Jimber del Rio.

**Investigation:** Amalia Hidalgo-Fernández, Juan Antonio Jimber del Rio.

**Methodology:** Virginia Navajas-Romero.

**Supervision:** Ricardo David Hernández-Rojas.

**Writing – original draft:** Ricardo David Hernández-Rojas.

**Writing – review & editing:** Ricardo David Hernández-Rojas, Amalia Hidalgo-Fernández, Juan Antonio Jimber del Rio.

## References

1. Luz N., Pilgrimage and religious tourism in Islam. *Annals of Tourism Research*, 2020. 82: p. 102915.
2. Oliveira M.G. and Luzia I., Temporal Layers in Heritage Tourism: Christianity and Islam in an Algarvian Chapel. *Religions*, 2020. 11(4): p. 188.
3. Koren-Lawrence N. and Collins-Kreiner N., Visitors with their 'Backs to the archaeology': religious tourism and archaeology. *Journal of Heritage Tourism*, 2019. 14(2): p. 138–149.
4. Razak N.A., MOSQUE TOURISM IN MALAYSIA: A MARKETING PERSPECTIVE. *International Journal of Social Science Research*, 2019. 1(2): p. 108–120.
5. Adie B.A., *Marketing Europe to Islamic heritage tourists*, in *The Routledge Handbook of Halal Hospitality and Islamic Tourism*. 2019, Routledge. p. 157–168.
6. Huang J. and Chu J., Tourist Experience at Religious Sites: A Case Study of the Chinese Visiting the Sheikh Zayed Grand Mosque. *Journal of China Tourism Research*, 2019: p. 1–25.
7. Vargas-Sánchez A. and Moral-Moral M., *Halal Tourism, Where Are We?: Particular Attention to the Situation in Spain*, in *Handbook of Research on Socio-Economic Impacts of Religious Tourism and Pilgrimage*. 2019, IGI Global. p. 211–232.
8. Vargas-Sánchez A. and Moral-Moral M., Halal tourism: state of the art. *Tourism Review*, 2019.
9. Bhuiyan M.A.H., et al., Potentials of Islamic tourism: A case study of Malaysia on east coast economic region. *Australian Journal of Basic and Applied Sciences*, 2011. 5(6): p. 1333–1340.
10. Hall C.M., Razzaq N., and Prayag G., Introduction to halal hospitality and Islamic tourism. *The Routledge handbook of Halal hospitality and Islamic tourism*, 2020: p. 1–18.
11. Battour M., Muslim travel behavior in halal tourism. *Mobilities, tourism and travel behavior-contexts and boundaries*, 2018.
12. Rahman M.K. and Zailani S., The effectiveness and outcomes of the Muslim-friendly medical tourism supply chain. *Journal of Islamic Marketing*, 2017.
13. Kessler K., Conceptualizing Mosque Tourism: A central feature of Islamic and Religious Tourism. *International Journal of Religious Tourism and Pilgrimage*, 2015. 3(2): p. 2.

14. Suárez R., et al., The sound of the cathedral-mosque of Córdoba. *Journal of cultural heritage*, 2005. 6 (4): p. 307–312.
15. King D.A., The enigmatic orientation of the Great Mosque of Córdoba. *Suhayl. International Journal for the History of the Exact and Natural Sciences in Islamic Civilisation*, 2018: p. 33–111.
16. Ortiz-Cordero R., Pastor E.L., and Fernández R.E.H., Proposal for the improvement and modification in the scale of evidence for virtual reconstruction of the cultural heritage: A first approach in the mosque-cathedral and the fluvial landscape of Cordoba. *Journal of Cultural Heritage*, 2018. 30: p. 10–15.
17. Vinuesa M.A.T., LAS CIUDADES PATRIMONIO DE LA HUMANIDAD DE ESPAÑA: EL DESAFÍO DE CONSTRUIR DESTINOS TURÍSTICOS SOSTENIBLE EN CLAVE DE PATRIMONIO CULTURAL. *Estudios Turísticos*, 2018(216): p. 27–54.
18. Lamprakos, M. Franco's Dream: Islamic Heritage and Global Politics, 1936–1975. in CAA 2019 ANNUAL CONFERENCE. 2019. CAA.
19. Wardi Y., Abror, & Trinanda O. (2018). Halal tourism: antecedent of tourist's satisfaction and word of mouth (WOM). *Asia Pacific Journal of Tourism Research*, 23(5), 463–472.
20. Chen H. and Rahman I., Cultural tourism: An analysis of engagement, cultural contact, memorable tourism experience and destination loyalty. *Tourism Management Perspectives*, 2018. 26: p. 153–163.
21. Rahman M., et al., Brand perception of halal tourism services and satisfaction: the mediating role of tourists' attitudes. *International Journal of Tourism Sciences*, 2019. 19(1): p. 18–37.
22. Jaelani A., Setyawan E., and Hasyim N., Religious heritage tourism and creative economy in Cirebon: The diversity of religious, cultures and culinary. *Journal of Social and Administrative Sciences*, 2016. 3(1).
23. Brayley R.E., Managing sacred sites for tourism: A case study of visitor facilities in Palmyra, New York. *Turizam: međunarodni znanstveno-stručni časopis*, 2010. 58(3): p. 289–300.
24. Becker E., Tour-guiding as a pious place-making practice: The case of the Sehitlik Mosque, Berlin. *Annals of Tourism Research*, 2018. 73: p. 81–90.
25. Moreno M.C.M., Turismo y producto turístico. Evolución, conceptos, componentes y clasificación. *Visión gerencial*, 2011(1): p. 135–158.
26. Azmi E. and Ismail M.Z., Cultural Heritage Tourism: Kapitan Keling mosque as a focal point & symbolic identity for Indian muslim in Penang. *Procedia-Social and Behavioral Sciences*, 2016. 222: p. 528–538.
27. Fattah A.A. and Eddy-U M.E., Mosque-visiting: Motivations and experiences of non-Muslim visitors at the Al-Azhar mosque in Egypt. *Turizam*, 2016. 20(3): p. 105–127.
28. Dibb S. and Simkin L., Market segmentation and segment strategy. *Marketing theory: A student text*, 2016: p. 251–279.
29. Battour M. and Ismail M.N., Halal tourism: Concepts, practises, challenges and future. *Tourism management perspectives*, 2016. 19: p. 150–154.
30. Fornell C., et al., The American customer satisfaction index: nature, purpose, and findings. *Journal of marketing*, 1996. 60(4): p. 7–18.
31. Hidalgo-Fernández A., et al., Tourist Motivations and Satisfaction in the Archaeological Ensemble of Madinat Al-Zahra. *Sustainability*, 2019. 11(5): p. 1380.
32. Canalejo A.M.C. and del Río J.A.J., Quality, satisfaction and loyalty indices. *Journal of Place Management and Development*, 2018.
33. Jimber del Río J.A., et al., The Loyalty of Tourism in Synagogues: The Special Case of the Synagogue of Córdoba. *International Journal of Environmental Research and Public Health*, 2020. 17(12): p. 4212. <https://doi.org/10.3390/ijerph17124212> PMID: 32545644
34. Fornell C., A national customer satisfaction barometer: The Swedish experience. *Journal of marketing*, 1992. 56(1): p. 6–21.
35. Andreassen T.W. and Lindestad B., The effect of corporate image in the formation of customer loyalty. *Journal of Service Research*, 1998. 1(1): p. 82–92.
36. Eklöf, J.A., European customer satisfaction index pan-European telecommunication sector report based on the pilot studies 1999. European Organization for Quality and European Foundation for Quality Management, Stockholm, Sweden, 2000.
37. Chang L., Backman K., and Huang Y., Creative Tourism: A Preliminary Examination of Creative Tourists' Motivation, Experience, Perceived Value and Their Revisit Intention. *Scientific Committee*, 2003. 359.
38. Shogren K.A., et al., The role of positive psychology constructs in predicting life satisfaction in adolescents with and without cognitive disabilities: An exploratory study. *The Journal of Positive Psychology*, 2006. 1(1): p. 37–52.



39. Muntaner-Mas A., et al., Teaching skills, students' emotions, perceived control and academic achievement in university students: A SEM approach. *Teaching and Teacher Education*, 2017. 67: p. 1–8.
40. Chygryn O., et al., Assessment of Fiscal Decentralization Influence on Social and Economic Development. *Montenegrin Journal of Economics*, 2018. 14(4): p. 69–84.
41. Bezerra G.C. and Gomes C.F., Determinants of passenger loyalty in multi-airport regions: Implications for tourism destination. *Tourism Management Perspectives*, 2019. 31: p. 145–158.
42. Gogoi D. and Jyoti B., Service quality measures: How it impacts customer satisfaction and loyalty. *International Journal of Management (IJM)*, 2020. 11(3): p. 354–365.
43. De Run E.C., et al., Attitudes towards offensive advertising: Malaysian Muslims' views. *Journal of Islamic Marketing*, 2010.
44. Yusof N.S., Shariff N.M., and Omar H., Muslim Tourists' Expectation towards Islamic Hospitality Services in Malaysia. *INTERNATIONAL JOURNAL OF ACADEMIC RESEARCH IN BUSINESS AND SOCIAL SCIENCES*, 2019. 9(6).
45. Jia X. and Chaozhi Z., "Halal tourism": is it the same trend in non-Islamic destinations with Islamic destinations? *Asia Pacific Journal of Tourism Research*, 2020. 25(2): p. 189–204.
46. Ramires A., Brandao F., and Sousa A.C., Motivation-based cluster analysis of international tourists visiting a World Heritage City: The case of Porto, Portugal. *Journal of Destination Marketing & Management*, 2018. 8: p. 49–60.
47. Kim M. and Thapa B., Perceived value and flow experience: Application in a nature-based tourism context. *Journal of destination marketing & management*, 2018. 8: p. 373–384.
48. Prayag G., Hosany S., and Odeh K., The role of tourists' emotional experiences and satisfaction in understanding behavioral intentions. *Journal of Destination Marketing & Management*, 2013. 2(2): p. 118–127.
49. Meng B. and Han H., Working-holiday tourism attributes and satisfaction in forming word-of-mouth and revisit intentions: Impact of quantity and quality of intergroup contact. *Journal of Destination Marketing & Management*, 2018. 9: p. 347–357.
50. Auh S., et al., Co-production and customer loyalty in financial services. *Journal of retailing*, 2007. 83(3): p. 359–370.
51. McKercher B., Ho P.S., and Du Cros H., Relationship between tourism and cultural heritage management: evidence from Hong Kong. *Tourism management*, 2005. 26(4): p. 539–548.
52. Hamzah A. and Hampton M.P., Resilience and non-linear change in island tourism. *Tourism Geographies*, 2013. 15(1): p. 43–67.
53. Sönmez S.F., Tourism, terrorism, and political instability. *Annals of tourism research*, 1998. 25(2): p. 416–456.
54. Kessler K. and Raj R., *Development of Mosque Tourism Framework as a Tool to Reduce Islamophobia*. 2017.
55. Kessler K., Conceptualizing Mosque Tourism: A central feature of Islamic and Religious Tourism. *The international journal of religious tourism and pilgrimage*, 2015. 3(2): p. 11–32.
56. Mustappa K.H., Analisis Hukum: Satu Sorotan Status Kopi Luwak (Musang). *Jurnal Penyelidikan*, 2012. 25.
57. Rahim, A.A., et al. Masjid for All: Access Audit on Masjid Sultan Idris Shah, Ipoh, Masjid Negeri, Seremban and Masjid Tunku Mizan, Putrajaya. in 4th International Conference on Universal Design in Built Environment. 2015.
58. Farrag E., Architecture of mosques and Islamic centers in Non-Muslim context. *Alexandria Engineering Journal*, 2017. 56(4): p. 613–620.
59. Aziz Y., et al., Exploring the Islamic and halal tourism definition. *Hospitality and Tourism 2015: Proceedings of HTC*, 2015: p. 139–150.
60. Mansor N., et al., Mosque Tourism Certification in Waqf Management: A Model by Ukhwah Samara. *Social Sciences and Humanities*, 2015. 23: p. 291–304.
61. Boll J.R., Irony made manifest: cultural contention and Córdoba's Mosque-Cathedral. *Journal of cultural geography*, 2017. 34(3): p. 275–302.
62. Aminian N. and Khodayar S., *Tourism Carrying Capacity Assessment for Historical Sites-Islahan Emam Mosque*. 2016.
63. Amalia Z., Tyas W.P., and Putra J.K., The Effect of The Religious Tourism of Menara Kudus on Community's Economy. *Jurnal Teknik Sipil dan Perencanaan*, 2020. 22(1): p. 64–72.
64. Baker J., Is it a mosque? The Islamization of space explored through residents' everyday 'discursive assemblages. *Identities*, 2019. 26(1): p. 12–32.

65. Rico T. and Lababidi R., Extremism in Contemporary Cultural Heritage Debates about the Muslim World. *Future Anterior: Journal of Historic Preservation, History, Theory, and Criticism*, 2017. 14(1): p. 95–105.
66. Zapata-Barrero R., The Muslim community and Spanish tradition. *Multiculturalism, Muslims and citizenship: A European approach*, 2006: p. 143–161.
67. Fernández R.E.H. and Ortiz-Cordero R., The Mosque-Cathedral of Córdoba: Evidence of column organization during their first construction s. VIII AD. *Journal of Cultural Heritage*, 2020.
68. Suárez R., et al., The acoustics of the Cathedral-Mosque of Córdoba. proposals for architectural intervention. *Acta Acustica united with Acustica*, 2004. 90(2): p. 362–375.
69. Alsabban R.F., *Analytical study of the mihrab dome at Cordoba's Great Mosque and the determination of Islamic prayer times in the Umayyad period*. 2017.
70. Noorani Y., The lost garden of al-Andalus: Islamic Spain and the poetic inversion of colonialism. *International Journal of Middle East Studies*, 1999. 31(2): p. 237–254.
71. Benur A.M. and Bramwell B., Tourism product development and product diversification in destinations. *Tourism management*, 2015. 50: p. 213–224.
72. Jaelani A., Halal tourism industry in Indonesia: Potential and prospects. *International Review of management and Marketing*, 2017. 7(3).
73. Junaidi J., Halal-friendly tourism and factors influencing halal tourism. *Management Science Letters*, 2020. 10(8): p. 1755–1762.
74. Przybytniowski J.W., Methods of service quality assessment in managing the property insurance market. *Business and Public Administration Studies*, 2020. 14(1): p. 46–52.
75. Ferri Sanz M., Durá Ferrandis E., and Garcés Ferrer J., Service quality scales and tourists with special needs: A systematic review. *Sustainability*, 2019. 11(14): p. 3844.
76. Suhartanto D., et al., Tourist loyalty in creative tourism: the role of experience quality, value, satisfaction, and motivation. *Current Issues in Tourism*, 2020. 23(7): p. 867–879.
77. Mohseni S., et al., Attracting tourists to travel companies' websites: the structural relationship between website brand, personal value, shopping experience, perceived risk and purchase intention. *Current Issues in Tourism*, 2018. 21(6): p. 616–645.
78. Alrwajfah M.M., Almeida-García F., and Cortés-Macías R., Residents' perceptions and satisfaction toward tourism development: A case study of Petra Region, Jordan. *Sustainability*, 2019. 11(7): p. 1907.
79. Kim M.J. and Hall C.M., A hedonic motivation model in virtual reality tourism: Comparing visitors and non-visitors. *International Journal of Information Management*, 2019. 46: p. 236–249.
80. Buhalis D., López E.P., and Martínez-González J.A., Influence of young consumers' external and internal variables on their e-loyalty to tourism sites. *Journal of Destination Marketing & Management*, 2020. 15: p. 100409.
81. Chen C.-F. and Tsai D., How destination image and evaluative factors affect behavioral intentions? *Tourism management*, 2007. 28(4): p. 1115–1122.
82. Sato S., et al., Adventure tourism motivation and destination loyalty: A comparison of decision and non-decision makers. *Journal of destination marketing & management*, 2018. 8: p. 74–81.
83. Jin N., Lee S., and Lee H., The effect of experience quality on perceived value, satisfaction, image and behavioral intention of water park patrons: New versus repeat visitors. *International Journal of Tourism Research*, 2015. 17(1): p. 82–95.
84. Loureiro S.M.C. and González F.J.M., The importance of quality, satisfaction, trust, and image in relation to rural tourist loyalty. *Journal of Travel & Tourism Marketing*, 2008. 25(2): p. 117–136.
85. Baker J.L. Crompton, Quality, satisfaction and behavioral intentions. *Annals of tourism research*, 2000. 27(3): p. 785–804.
86. Kozak M., Repeaters' behavior at two distinct destinations. *Annals of tourism research*, 2001. 28(3): p. 784–807.
87. Kozak M. and Rimmington M., Tourist satisfaction with Mallorca, Spain, as an off-season holiday destination. *Journal of travel research*, 2000. 38(3): p. 260–269.
88. Yoon Y. and Uysal M., An examination of the effects of motivation and satisfaction on destination loyalty: a structural model. *Tourism management*, 2005. 26(1): p. 45–56.
89. Chi C.G.-Q. and Qu H., Examining the structural relationships of destination image, tourist satisfaction and destination loyalty: An integrated approach. *Tourism management*, 2008. 29(4): p. 624–636.
90. Yu T.-W. and Chen T.-J., Online travel insurance purchase intention: A transaction cost perspective. *Journal of Travel & Tourism Marketing*, 2018. 35(9): p. 1175–1186.

91. Yuksel A., Yuksel F., and Bilim Y., Destination attachment: Effects on customer satisfaction and cognitive, affective and conative loyalty. *Tourism management*, 2010. 31(2): p. 274–284.
92. Nair V., et al., Destination quality and tourists' behavioural intentions: rural tourist destinations in Malaysia. *Worldwide Hospitality and Tourism Themes*, 2015.
93. Lichtenstein D.R., Netemeyer R.G., and Burton S., Distinguishing coupon proneness from value consciousness: An acquisition-transaction utility theory perspective. *Journal of marketing*, 1990. 54(3): p. 54–67.
94. Chang K.F. Backman, and Huang Y.C., Creative tourism: a preliminary examination of creative tourists' motivation, experience, perceived value and revisit intention. *International Journal of Culture, Tourism and Hospitality Research*, 2014.
95. Wong I.A., Ji M., and Liu M.T., The effect of event supportive service environment and authenticity in the quality–value–satisfaction framework. *Journal of Hospitality & Tourism Research*, 2018. 42(4): p. 563–586.
96. Gamedze-Mshayisa D.I., et al., Factors associated with women's perception of and satisfaction with quality of intrapartum care practices in Swaziland. *Midwifery*, 2018. 57: p. 32–38. <https://doi.org/10.1016/j.midw.2017.10.016> PMID: 29153982
97. Antón C., Camarero C., and Laguna-García M., Towards a new approach of destination loyalty drivers: Satisfaction, visit intensity and tourist motivations. *Current Issues in Tourism*, 2017. 20(3): p. 238–260.
98. Alrawadieh Z., Alrawadieh Z., and Kozak M., Exploring the impact of tourist harassment on destination image, tourist expenditure, and destination loyalty. *Tourism Management*, 2019. 73: p. 13–20.
99. Hallak R., Assaker G., and El-Haddad R., Re-examining the relationships among perceived quality, value, satisfaction, and destination loyalty: A higher-order structural model. *Journal of Vacation Marketing*, 2018. 24(2): p. 118–135.
100. Azhar M.E., Prayogi M.A., and Sari M., The Role Of Marketing Mix And Service Quality On Tourist Satisfaction And Loyalty At Samosir. *Revista de turism-studii si cercetari in turism*, 2018(26).
101. Prayag G., et al., Understanding the relationships between tourists' emotional experiences, perceived overall image, satisfaction, and intention to recommend. *Journal of Travel Research*, 2017. 56(1): p. 41–54.
102. Agyeiwaah E., et al., Understanding culinary tourist motivation, experience, satisfaction, and loyalty using a structural approach. *Journal of Travel & Tourism Marketing*, 2019. 36(3): p. 295–313.
103. Thi K., et al., The effects of service quality on international tourist satisfaction and loyalty: Insight from Vietnam. *International Journal of Data and Network Science*, 2020. 4(2): p. 179–186.
104. Escamilla Santamaría, M.A., Revisión conceptual de la lealtad en servicios hoteleros. 2011, Universidad Nacional de Colombia.
105. Duque-Oliva E.J. and Rodríguez-Romero C.A., Perceived service quality in electronic commerce: An application. *Innovar*, 2011. 21(42): p. 89–98.
106. Fernandez Neto, S., Zoneamento Geoambiental em microbacia hidrográfica do semiárido Paraibano. Programa de Pós-Graduação em recursos naturais. Universidade Federal de Campina Grande-UFCG, Campina Grande, PB, 2013.
107. Kim J.-H., The antecedents of memorable tourism experiences: The development of a scale to measure the destination attributes associated with memorable experiences. *Tourism management*, 2014. 44: p. 34–45.
108. Veasna S., Wu W.-Y., and Huang C.-H., The impact of destination source credibility on destination satisfaction: The mediating effects of destination attachment and destination image. *Tourism Management*, 2013. 36: p. 511–526.
109. Assaker G., Vinzi V.E., and O'Connor P., Examining the effect of novelty seeking, satisfaction, and destination image on tourists' return pattern: A two factor, non-linear latent growth model. *Tourism management*, 2011. 32(4): p. 890–901.
110. San Martín H., Herrero A., and García de los Salmones M.d.M., An integrative model of destination brand equity and tourist satisfaction. *Current Issues in Tourism*, 2019. 22(16): p. 1992–2013.
111. Ritsos, P.D., et al., archaeological reconstruction," 30th Anniversary of the UNESCO World Heritage Convention-Virtual Congress: Architecture, Tourism and World Heritage, Beijing, 2002. 2002.
112. Cronin J.J. Jr, Brady M.K., and Hult G.T.M., Assessing the effects of quality, value, and customer satisfaction on consumer behavioral intentions in service environments. *Journal of retailing*, 2000. 76(2): p. 193–218.
113. Ahsan A., et al., Model Development of Nursing Service Loyalty. *Indian Journal of Public Health Research & Development*, 2019. 10(1): p. 495–499.

114. Kock N., Common method bias in PLS-SEM: A full collinearity assessment approach. *International Journal of e-Collaboration (ijec)*, 2015. 11(4): p. 1–10.
115. Farooq M.S., et al., Impact of service quality on customer satisfaction in Malaysia airlines: A PLS-SEM approach. *Journal of Air Transport Management*, 2018. 67: p. 169–180.
116. Nguyen T.H.H. and Cheung C., Chinese heritage tourists to heritage sites: what are the effects of heritage motivation and perceived authenticity on satisfaction? *Asia Pacific Journal of Tourism Research*, 2016. 21(11): p. 1155–1168.
117. Kempiak J., et al., The heritage tourist: an understanding of the visitor experience at heritage attractions. *International Journal of Heritage Studies*, 2017. 23(4): p. 375–392.
118. Qi L., et al., Time-aware distributed service recommendation with privacy-preservation. *Information Sciences*, 2019. 480: p. 354–364.
119. Cheng B.L., et al., Service recovery, customer satisfaction and customer loyalty: evidence from Malaysia's hotel industry. *International Journal of Quality and Service Sciences*, 2019.
120. Hosany S. and Prayag G., Patterns of tourists' emotional responses, satisfaction, and intention to recommend. *Journal of Business Research*, 2013. 66(6): p. 730–737.
121. Loureiro S.M.C. and González F.J.M., Calidad, satisfacción y fidelidad en el turismo rural: un análisis hispano-portugués. *Papers de turisme*, 2012(40): p. 49–65.
122. Nunnally J.C. and Bernstein I.H., *Psychological theory*. 1994, New York: McGraw-Hill.
123. Henseler J., Ringle C., and Sarstedt M., *A new criterion for assessing discriminant validity in variance-based structural equation*. 2015.
124. Sarstedt M., et al., How to specify, estimate, and validate higher-order constructs in PLS-SEM. *Australasian Marketing Journal (AMJ)*, 2019. 27(3): p. 197–211.
125. Hair J.F., Ringle C.M., and Sarstedt M., Partial least squares: the better approach to structural equation modeling? *Long Range Planning*, 2012. 45(5–6): p. 312–319.
126. Barclay D., Higgins C., and Thompson R., The partial least squares (PLS) approach to casual modeling: personal computer adoption and use as an illustration. 1995.
127. Henseler J., Bridging design and behavioral research with variance-based structural equation modeling. *Journal of advertising*, 2017. 46(1): p. 178–192.
128. Diamantopoulos A. and Winklhofer H.M., Index construction with formative indicators: An alternative to scale development. *Journal of marketing research*, 2001. 38(2): p. 269–277.
129. Mathieson K., Peacock E., and Chin W.W., Extending the technology acceptance model: the influence of perceived user resources. *ACM SIGMIS Database: The DATABASE for Advances in Information Systems*, 2001. 32(3): p. 86–112.
130. Henseler J. and Chin W.W., A comparison of approaches for the analysis of interaction effects between latent variables using partial least squares path modeling. *Structural Equation Modeling*, 2010. 17(1): p. 82–109.
131. Belsley D.A., A guide to using the collinearity diagnostics. *Computer Science in Economics and Management*, 1991. 4(1): p. 33–50.
132. Roberts N. and Thatcher J., Conceptualizing and testing formative constructs: Tutorial and annotated example. *ACM SIGMIS Database: The DATABASE for Advances in Information Systems*, 2009. 40(3): p. 9–39.
133. Fornell C. and Larcker D.F., *Structural equation models with unobservable variables and measurement error. Algebra and statistics*. 1981, SAGE Publications Sage CA: Los Angeles, CA.
134. Sarstedt M., et al., On the emancipation of PLS-SEM: A commentary on Rigdon (2012). *Long range planning*, 2014. 47(3): p. 154–160.
135. Hair J.F., Ringle C.M., and Sarstedt M., Partial least squares structural equation modeling: Rigorous applications, better results and higher acceptance. *Long range planning*, 2013. 46(1–2): p. 1–12.
136. Cossío-Silva F.-J., Revilla-Camacho M.-Á., and Vega-Vázquez M., The tourist loyalty index: A new indicator for measuring tourist destination loyalty? *Journal of Innovation & Knowledge*, 2019. 4(2): p. 71–77.
137. Senarath S. and Ranasinghe J., *Destination Image and Destination Loyalty: Comparison between Asia Pacific and European Tourists*. 2019.
138. Kim S.A. Park, Social media review rating versus traditional customer satisfaction. *International Journal of Contemporary Hospitality Management*, 2017.
139. Korstanje M.E., Islamic motivation for tourism and contradictions of the American tradition. *Spiritual and Religious Tourism: Motivations and Management*, 2019: p. 32.

140. Wang T.-L., Tran P.T.K., and Tran V.T., Destination perceived quality, tourist satisfaction and word-of-mouth. *Tourism Review*, 2017.
141. Rahman M.K., Motivating factors of Islamic tourist's destination loyalty: an empirical investigation in Malaysia. *Journal of Tourism and Hospitality Management*, 2014. 2(1): p. 63–77.
142. Bazazo I., et al., The impact of Islamic attributes of destination on destination loyalty via the mediating effect of tourist satisfaction. *International Journal of Business Administration*, 2017. 8(4): p. 65–78.
143. Su L., Hsu M.K., and Swanson S., The effect of tourist relationship perception on destination loyalty at a world heritage site in China: The mediating role of overall destination satisfaction and trust. *Journal of Hospitality & Tourism Research*, 2017. 41(2): p. 180–210.
144. Pereira H.G., de Fátima Salgueiro M., and Rita P., Online purchase determinants of loyalty: The mediating effect of satisfaction in tourism. *Journal of Retailing and consumer Services*, 2016. 30: p. 279–291.
145. Osman Z. and Sentosa I., Mediating effect of customer satisfaction on service quality and customer loyalty relationship in Malaysian rural tourism. *International Journal of Economics Business and Management Studies*, 2013. 2(1): p. 25–37.
146. Soltani A., et al., Exploring city branding strategies and their impacts on local tourism success, the case study of Kumamoto Prefecture, Japan. *Asia Pacific Journal of Tourism Research*, 2018. 23(2): p. 158–169.
147. Pratiwi R. and Latif M.I., SHARIA MARKETING MIX TERHADAP MINAT MENGINAP KEMBALI DI HOTEL GRASIA SEMARANG. *Magisma: Jurnal Ilmiah Ekonomi dan Bisnis*, 2020. 8(1): p. 27–33.
148. Sobari N., Kurniati A., and Usman H., The influence of Islamic attributes and religious commitments toward halal wellness services customer satisfaction and loyalty. *Journal of Islamic Marketing*, 2019.
149. Umar M.H. and Ashaari M.F., Pelaksanaan dan Pengurusan Masjid Pelancongan di Malaysia [The Implementation and Management of Tourism Mosque in Malaysia]. *Jurnal Islam dan Masyarakat Kontemporari*, 2019. 20: p. 1.
150. Best R.J., *Marketing estratégico*. 2007: Pearson Educación Madrid.
