# Supplementary material for: Tourist loyalty and mosque tourism: The case of the Mosque-Cathedral in Córdoba (Spain)
Source: PLoS One. 2020 Dec 1;15(12):e0242866. doi: 10.1371/journal.pone.0242866 (PMC7707557; doi:10.1371/journal.pone.0242866)
Supplement: S1 Data — (XLSX) [file pone.0242866.s001.xlsx]

## Sheet: answer
Time mark	[Prestigious of the city. Expectation.Exp1]	Prestige of the city. Perceived quality]	Cultural wealth. Expectation.Exp2]	Cultural wealth. Perceived quality]	Hospitality/treatment. Expectation.Exp3]	[Hospitality/Treatment. Perceived quality]	Degree of masification of the city. Expectation.Exp4]	Degree of masification of the city. Perceived quality]	Prestige of the Mosque-Cathedral. Expectation.Exp5]	[Prestige of the Mosque-Catedra. Perceived quality]	Conservation of the Mosque-Cathedral. Expetc. Exp6]	Conservation of the Mosque-Cathedral. Quality.CAL6]	Waiting time for the Mosque-Cathedral. Expectation.Exp7]	Waiting time for the Mosque-Cathedral. Perceived quality]	[Information and signaling. Expectation.Exp8]	[Information and Signaling Perceived Quality]	[Security in general. ExpectationExp9]	[Security in general. Perceived quality]	Conservation and cleanliness city. Expectation.Exp10]	[City conservation and cleanliness. Perceived quality]	[Information and signage TO ARRIVE. Expectation.Exp 11]	[Information and Signaling Perceived Quality]	[Security in the Mosque-Cathedral. Expectation.Expect 12]	Security at the Mosque-Cathedral. Perceived quality]	Conservation and cleaning in the Mosque. Expectation.Expt 13]	Conservation and cleaning at the Mosque. Perceived quality]	[City Restoration Offer. Expectation.Exp14]	Offer of restoration in city. Perceived quality.]	Offer of accommodation in the city. Expectation.Exp15]	Offer of accommodation in the city. Perceived quality]	Communications to get to the city. Expectation.Exp16]	Communications to get to the city. Quality ]	TRANSPORT, ACCOMMODATION AND RESTAURATION around THE MEZQUITA: EXPT17 [Offer of restoration in TORNO A LA MEZQUITA. Perceived quality. Expect 17]	[Value for money RESTAURANTS]	Offer of accommodation AROUND MEZQUITA. Expectation. Exp 18]	Offer of accommodation AROUND MEZQUITA. Perceived quality]	[Commercial offer around the Mosque. Expectation.Exp 19]	[Commercial offer around the Mosque. Perceived Quality.]	The visit to the Mosque-Cathedral has been satisfactory. Sat1]	The visit to the Mosque-Cathedral has met my expectations as a tourist. Sat2]	The treatment received by the professionals of the Mosque-Cathedral has been satisfactory. Sat3]	The cultural heritage of the monument has been better than expected. Sat4]	The cost of admission to the Mosque-Cathedral is worth it. Sat5]	Overall, my experience with the surroundings of the Mosque-Cathedral has been positive. Sat6]	Degree of satisfaction with additional services available at mosque-cathedral.Sat7]	I would recommend my friends or family to visit the City of Cordoba.Loy1]	[I will visit the City of Cordoba again on my next vacation. loy2]	I will visit the City of Cordoba again in the short or medium term. loy3]	[I would recommend my friends and family to visit the Mosque-Cathedral.Loy4]
Time mark	EXP1	CAL1	EXP2	CAL2	EXP3	CAL3	EXP4	CAL4	EXP5	CAL5	EXP6	CAL6	EXP7	CAL7	EXP8	CAL8	EXP9	CAL9	EXP10	CAL10	EXP11	CAL11	EXP12	CAL12	EXP13	CAL13	EXP14	CAL14	EXP15	CAL15	EXP16	CAL16	EXP17	CALIDAD/PRECIO RTES	EXP18	CAL18	EXP19	CAL19	SAT1	SAT2	SAT3	SAT4	SAT5	SAT6	SAT7	LEALTAD1	LEALTAD2	LEALTAD3	LEALTAD4
2019-12-10 17:22:07	5	6	6	6	5	7	4	6	7	7	5	6	6	4	6	6	5	5	6	7	5	5	5	7	6	7	6	7	6	6	6	6	6	7	6	5	6	5	7	7	6	6	7	7	6	7	4	3	7
2019-12-10 17:23:15	6	6	7	7	7	6	6	6	6	6	7	6	6	6	7	7	7	7	7	7	5	6	7	6	7	7	6	6	7	7	6	6	6	6	6	6	6	6	7	7	7	7	7	7	7	7	7	7	7
2019-12-10 17:23:38	5	5	7	7	5	7	6	6	6	6	6	7	5	5	4	4	6	6	7	7	4	4	5	5	6	6	5	5	5	5	5	5	5	5	6	6	4	4	4	5	5	6	6	6	6	5	6	4	6
2019-12-10 17:37:08	5	6	4	4	6	6	5	7	7	6	6	6	2	2	5	4	6	6	6	6	7	4	7	7	7	7	5	6	5	6	6	6	6	4	5	6	4	6	7	5	6	6	7	5	3	7	6	7	7
2019-12-10 17:37:12	5	6	4	4	6	6	5	7	7	6	6	6	7	7	5	4	6	6	6	6	7	4	7	7	7	7	5	6	5	6	6	6	6	5	6	4	3	3	7	5	6	6	7	5	3	7	6	7	7
2019-12-10 17:37:33	5	6	4	4	6	6	5	7	7	6	6	6	1	1	5	5	6	6	6	6	7	4	7	7	7	7	5	6	5	6	5	6	6	4	5	6	4	6	7	5	6	6	7	5	3	7	6	6	7
2019-12-10 17:42:35	5	6	5	6	5	6	5	6	4	4	5	5	6	6	5	5	5	6	6	6	5	6	5	5	5	6	5	4	5	5	4	5	5	5	5	5	5	6	7	7	7	7	7	7	7	5	6	7	6
2019-12-10 17:42:37	5	6	6	5	6	7	6	6	5	6	4	5	5	5	6	5	6	6	6	7	4	5	4	4	7	7	5	5	6	7	7	7	5	6	6	6	6	5	7	7	7	7	7	7	7	7	7	6	7
2019-12-10 17:42:37	5	6	5	6	5	6	5	6	6	7	6	7	5	4	6	6	7	6	7	7	5	6	6	7	7	7	5	6	4	5	5	5	6	7	6	6	5	5	7	7	7	7	7	7	7	7	7	6	7
2019-12-10 17:48:21	7	7	7	7	6	7	6	7	5	6	6	7	4	5	6	6	6	6	7	7	5	6	5	6	6	6	6	6	5	5	6	6	6	6	6	6	6	6	7	7	5	7	5	7	6	7	7	5	7
2019-12-10 17:48:22	7	7	7	7	7	7	6	6	4	5	5	4	4	5	4	5	5	4	5	4	2	3	3	3	4	4	5	6	6	6	5	5	6	6	6	7	7	7	7	7	5	7	4	7	6	7	7	5	7
2019-12-10 17:48:22	4	5	5	6	5	5	5	6	5	6	5	5	4	5	6	7	6	6	6	5	5	6	6	6	6	7	5	5	5	6	4	6	5	5	6	7	6	6	7	7	5	7	7	7	6	7	7	5	7
2019-12-10 17:54:46	6	7	6	6	5	6	5	5	4	5	4	4	5	7	5	5	6	7	5	5	4	5	4	4	5	6	4	5	6	7	5	6	5	6	5	5	6	7	6	7	5	5	5	6	6	7	7	4	7
2019-12-10 17:56:34	4	5	4	5	5	4	5	5	6	6	6	6	5	5	6	6	6	6	6	6	5	6	5	7	7	7	5	6	6	6	6	7	6	7	6	6	6	6	6	6	7	6	6	6	7	7	7	7	7
2019-12-10 17:57:10	4	5	4	5	5	5	6	5	6	4	5	4	5	5	5	5	5	5	5	5	4	5	5	5	5	5	6	6	6	7	7	7	5	5	5	5	5	5	6	6	6	6	5	5	5	6	6	7	7
2019-12-10 18:06:42	6	6	5	5	5	6	5	6	6	6	7	7	3	3	5	6	5	6	7	7	5	5	7	7	7	7	5	5	5	5	6	6	6	6	7	7	6	6	7	7	7	7	6	7	6	7	7	4	6
2019-12-10 18:06:45	5	5	7	7	7	7	6	6	3	3	4	4	7	6	6	6	6	5	4	5	4	4	5	5	5	6	7	7	6	6	5	5	5	5	4	5	5	4	7	7	7	6	6	7	7	7	7	5	6
2019-12-10 18:06:51	5	6	5	5	6	7	6	7	6	6	5	7	5	6	6	6	5	6	5	6	4	5	6	6	5	6	5	5	6	7	6	6	5	6	5	5	5	6	7	7	6	7	7	6	7	7	6	4	6
2019-12-10 18:09:33	4	5	4	4	5	6	6	6	6	6	5	6	6	7	5	6	5	5	5	6	6	6	6	7	5	6	5	6	5	5	6	7	5	6	5	5	6	7	6	6	7	6	7	6	4	7	6	3	7
2019-12-10 18:09:48	3	4	4	3	3	4	4	4	3	3	5	5	4	4	4	4	5	5	5	5	5	5	5	4	4	4	5	5	4	4	5	5	4	5	6	6	4	4	5	5	5	5	4	4	4	6	5	5	5
2019-12-10 18:09:54	3	4	4	4	4	3	4	4	5	5	5	5	4	4	6	6	7	7	7	7	4	4	5	5	6	6	5	5	5	5	6	6	6	6	6	6	7	7	6	6	6	5	5	6	6	6	6	6	6
2019-12-10 18:14:42	6	6	6	7	6	5	4	5	4	5	4	4	4	5	5	5	4	5	4	4	4	4	5	4	3	5	5	5	5	6	5	6	4	4	5	4	4	4	6	5	6	5	7	7	6	6	6	5	6
2019-12-10 18:14:46	5	5	5	6	6	6	6	5	5	5	4	5	5	4	6	6	7	7	7	7	6	6	7	7	7	7	5	5	7	7	7	7	5	5	6	6	6	7	5	5	6	7	7	7	7	5	5	5	6
2019-12-10 18:14:50	6	6	7	7	6	6	7	7	5	6	7	7	7	7	6	6	7	7	7	7	6	6	7	7	7	7	6	6	6	6	6	6	6	6	6	5	5	7	6	6	6	6	6	6	6	7	7	7	7
2019-12-10 18:18:03	5	6	5	5	7	7	6	6	6	6	7	7	6	7	6	6	6	6	7	6	5	5	6	6	5	6	6	6	6	7	6	7	6	5	5	5	6	6	7	7	7	7	6	7	6	5	6	5	6
2019-12-10 18:18:05	6	7	6	7	6	7	6	7	5	6	6	6	5	5	5	6	5	5	6	7	6	6	6	7	6	5	5	6	5	5	6	6	6	6	6	7	6	7	7	6	6	7	6	6	7	5	5	6	7
2019-12-10 18:20:21	6	6	6	6	6	6	7	7	6	6	7	7	4	4	6	6	7	7	7	7	6	6	7	6	7	7	6	6	5	5	6	6	6	6	5	5	6	6	6	6	6	7	5	6	6	7	7	7	7
2019-12-10 18:22:09	6	5	5	6	6	7	7	7	5	6	6	7	6	7	6	6	6	7	6	7	6	7	6	6	6	7	5	5	6	7	6	7	6	7	6	6	6	7	6	7	6	5	6	6	7	5	6	6	6
2019-12-10 18:22:28	6	6	6	6	7	6	7	6	5	5	6	5	6	5	6	6	7	7	7	7	3	3	4	4	7	7	5	5	6	6	5	5	5	5	6	6	6	5	6	6	7	7	4	6	7	6	7	4	6
2019-12-10 18:24:33	5	6	5	5	5	5	4	5	6	6	6	6	5	5	6	6	7	7	7	7	5	6	7	7	7	7	4	4	4	4	6	6	6	6	5	5	5	6	7	7	7	7	7	7	7	5	5	5	7
2019-12-10 18:25:04	6	6	6	7	7	7	6	6	6	6	7	7	6	6	5	5	6	6	5	6	3	3	4	4	5	5	7	7	7	7	7	7	6	7	7	7	6	7	5	5	5	6	6	6	6	5	5	5	5
2019-12-10 18:25:22	5	6	6	6	5	6	5	5	5	6	5	5	5	7	5	6	6	6	5	6	6	6	7	6	6	6	6	7	6	6	6	5	5	4	4	4	4	5	7	6	7	6	6	6	5	7	5	6	7
2019-12-10 18:28:09	6	6	7	7	6	6	7	7	5	5	5	6	6	6	6	6	6	5	5	5	6	6	5	5	6	5	6	5	6	6	6	5	7	7	6	6	7	7	6	6	6	5	5	5	6	6	6	5	6
2019-12-10 18:30:29	6	6	7	7	7	7	7	7	6	6	7	7	7	7	6	6	6	6	6	6	6	6	5	6	6	6	6	5	5	5	6	6	6	5	5	5	6	6	7	6	7	7	6	6	6	7	5	5	6
2019-12-10 21:03:31	6	5	7	7	6	6	5	4	7	5	6	6	5	4	6	5	7	7	6	4	6	5	7	6	7	7	7	7	6	6	7	6	7	4	6	5	6	5	7	7	6	5	4	6	5	6	2	3	5
2019-12-10 21:09:11	5	5	6	5	6	6	5	6	6	7	5	5	5	3	6	5	6	7	5	2	6	5	7	7	6	5	6	7	6	5	6	6	6	4	6	6	5	6	6	7	6	6	4	5	6	6	1	1	7
2019-12-11 15:25:47	5	6	6	6	6	5	4	2	7	7	7	7	4	4	6	4	7	7	6	5	6	4	7	4	7	5	5	6	6	6	6	3	5	5	5	7	6	5	7	6	6	5	6	6	4	6	2	3	7
2019-12-11 15:43:19	7	7	6	7	7	7	6	6	7	7	6	7	5	6	5	5	6	7	6	6	6	6	5	6	6	7	7	7	6	7	6	6	7	7	7	7	6	6	7	7	6	6	7	6	7	7	7	7	7
2019-12-11 16:18:30	5	5	7	6	6	7	5	6	7	7	5	6	5	5	5	4	5	5	5	6	6	3	6	5	6	7	5	6	5	7	6	6	6	6	6	7	6	6	6	6	6	7	5	6	4	7	4	6	6
2019-12-11 16:19:50	7	5	6	6	5	5	6	4	6	5	6	6	6	7	5	4	5	6	4	5	5	6	5	5	6	6	5	5	6	6	6	6	5	4	5	4	5	5	7	6	6	5	6	5	3	5	5	4	5
2019-12-11 16:28:17	7	7	7	7	6	6	7	7	7	7	7	7	5	7	6	6	6	6	6	6	6	6	6	7	6	7	7	6	7	7	6	5	6	6	6	6	6	7	7	7	7	7	6	7	4	7	6	6	7
2019-12-11 16:41:01	6	7	7	7	6	6	7	6	5	6	7	7	3	7	7	7	6	6	7	6	6	6	7	7	7	7	6	6	4	4	7	7	7	7	4	4	7	7	7	4	4	4	4	4	5	7	5	5	7
2019-12-11 16:49:05	7	6	5	6	7	7	5	6	6	7	5	7	2	1	5	5	4	7	6	6	6	6	4	4	5	4	6	7	6	6	7	7	5	6	7	6	7	7	6	7	6	4	4	6	6	6	7	6	7
2019-12-11 16:49:29	7	5	7	6	6	6	2	2	6	7	7	6	2	1	7	6	7	6	7	6	6	5	6	5	7	7	7	6	7	6	6	6	6	5	7	6	6	6	6	7	7	7	7	7	7	7	6	6	6
2019-12-11 16:53:32	6	7	6	6	7	7	1	2	6	6	6	5	7	7	7	6	7	7	6	6	6	7	6	4	6	7	7	7	6	5	7	7	7	6	6	6	5	5	5	6	4	5	5	6	4	5	7	6	7
2019-12-11 16:53:58	6	5	6	6	7	7	7	7	5	6	7	7	7	7	7	7	7	6	6	7	7	7	6	6	7	7	7	6	6	7	7	6	7	7	6	6	7	7	7	7	7	7	7	7	7	7	6	6	7
2019-12-11 16:53:59	7	7	7	7	6	6	7	6	7	7	5	5	1	1	6	6	7	7	7	7	6	6	6	6	7	6	3	3	4	4	6	6	7	7	5	4	5	5	7	7	6	5	5	5	5	6	3	3	6
2019-12-11 16:55:59	7	7	7	7	7	7	7	7	7	7	7	7	7	7	7	7	7	7	7	7	7	7	7	7	7	7	6	6	6	6	6	6	6	7	7	6	7	7	5	7	6	7	6	7	7	6	7	6	7
2019-12-11 17:01:53	6	4	5	5	6	6	3	2	6	6	6	5	4	4	6	6	6	5	6	6	6	6	6	5	6	6	6	6	6	5	5	6	6	6	5	6	6	6	6	6	6	6	6	6	6	7	2	4	6
2019-12-11 17:03:15	6	4	6	7	6	7	2	1	6	5	6	6	7	6	5	7	6	5	6	6	6	7	6	5	5	7	5	6	5	6	5	6	6	2	5	3	6	4	5	7	6	7	6	7	6	4	6	7	6
2019-12-11 17:05:16	5	4	6	7	7	7	6	7	6	7	6	6	6	7	7	7	6	6	7	7	6	7	7	7	6	7	4	4	5	6	6	6	4	4	4	4	7	7	6	7	6	6	6	6	7	7	7	4	4
2019-12-11 17:06:43	6	5	7	6	6	6	1	1	6	6	7	7	1	1	6	6	5	5	5	6	6	5	4	5	6	6	1	1	2	2	6	7	2	2	1	2	7	7	6	5	7	7	7	7	7	5	6	1	6
2019-12-11 17:07:00	6	7	6	7	7	7	7	7	6	6	5	7	6	7	5	6	7	5	4	7	6	5	7	6	7	6	4	5	7	5	6	6	5	6	5	7	5	6	4	7	5	6	7	5	7	4	6	5	7
2019-12-11 17:12:19	7	7	7	6	6	7	7	7	7	7	7	7	7	7	7	7	7	7	7	7	7	7	7	7	7	7	4	4	4	4	4	4	4	4	4	4	4	4	7	6	7	7	7	7	7	7	7	7	7
2019-12-11 17:14:54	6	7	5	7	6	7	6	6	6	7	5	6	5	7	6	7	5	6	5	7	6	5	6	5	4	6	2	3	4	3	4	5	6	5	7	4	6	7	5	6	7	6	7	7	7	5	6	7	5
2019-12-11 17:19:42	5	4	5	6	7	7	2	3	7	7	5	6	6	6	7	7	7	7	7	7	6	7	7	7	7	7	6	7	6	5	6	6	7	7	6	6	5	6	7	7	7	7	5	5	1	6	1	6	5
2019-12-11 17:20:28	5	7	6	7	5	7	1	2	6	4	3	6	4	6	5	4	6	6	5	7	6	5	7	6	7	5	3	7	5	6	7	7	5	5	6	7	5	6	7	7	5	7	6	5	6	6	5	7	7
2019-12-11 17:25:51	6	7	7	7	6	7	7	7	7	7	7	7	7	7	7	7	7	7	7	7	7	7	6	6	7	7	4	4	7	7	7	7	4	4	6	6	6	6	7	7	7	7	7	7	7	7	1	1	7
2019-12-11 17:27:13	5	4	6	6	5	6	6	4	7	7	6	7	2	2	6	6	7	7	5	6	4	5	7	7	6	6	6	7	7	7	6	6	7	6	6	6	2	2	7	7	7	6	6	4	2	5	1	5	7
2019-12-11 17:28:06	6	7	6	7	7	7	1	2	6	5	5	6	2	1	4	5	4	6	6	7	6	5	7	7	6	6	6	7	7	7	6	7	6	5	7	5	5	4	6	6	5	6	5	6	5	5	6	7	6
2019-12-11 17:32:16	5	6	7	6	7	7	3	3	7	7	7	7	6	6	4	5	7	7	6	6	6	6	7	7	7	7	6	6	3	4	5	5	6	6	5	5	3	3	7	7	7	7	3	4	7	7	5	5	6
2019-12-11 17:32:49	6	5	7	7	7	7	6	6	5	6	6	5	7	6	6	5	7	6	6	6	6	5	5	7	6	7	6	6	5	5	7	7	6	7	6	6	7	7	7	7	6	7	5	6	7	6	5	6	7
2019-12-11 17:33:26	6	6	6	7	7	7	6	6	7	7	7	7	7	7	7	7	7	7	7	7	6	6	6	6	7	7	6	6	6	6	6	6	4	4	4	4	5	6	7	7	7	7	7	7	7	7	1	1	7
2019-12-11 17:49:18	7	6	6	6	7	7	6	5	7	6	6	6	6	6	5	5	6	7	7	7	6	6	7	7	7	7	5	5	4	4	5	7	5	5	4	4	3	3	7	7	7	6	6	6	2	6	1	3	6
2019-12-11 18:14:51	5	6	6	7	7	7	7	2	6	7	6	5	6	5	5	6	6	6	5	7	5	7	7	6	6	7	4	7	6	7	5	7	6	7	7	6	6	7	6	5	7	7	7	6	4	6	5	7	7
2019-12-11 18:18:47	6	5	6	7	7	7	7	5	6	7	7	7	6	5	5	6	6	7	7	6	6	5	7	7	6	6	7	6	4	5	6	7	5	5	6	5	6	6	5	6	7	6	6	6	6	7	6	7	6
2019-12-11 19:25:23	7	5	5	5	7	7	6	6	7	5	7	5	7	6	5	7	6	6	6	7	5	7	7	7	7	7	7	5	6	5	4	6	5	6	4	7	5	7	5	6	6	5	4	7	6	7	5	5	7
2019-12-11 22:10:40	7	6	6	6	7	7	6	5	7	6	6	6	6	6	5	5	6	7	7	7	6	6	7	7	7	7	5	5	4	4	5	7	5	5	4	4	3	3	7	7	7	6	6	6	2	6	1	3	6
2019-12-11 22:15:35	7	7	7	7	4	4	3	3	6	6	7	7	5	4	5	5	6	6	5	5	7	7	7	7	6	6	7	7	6	6	7	7	6	5	5	5	5	5	7	7	7	7	6	7	7	7	7	7	7
2019-12-11 23:14:48	6	6	7	6	6	5	5	6	7	6	6	5	5	2	6	5	6	7	6	3	6	5	6	7	6	6	7	7	6	5	6	6	6	3	6	5	6	6	6	6	7	6	5	6	5	6	1	1	6
2019-12-12 10:25:46	5	5	7	6	5	6	5	5	6	6	7	7	5	1	5	4	6	6	6	5	6	6	5	7	4	6	6	6	5	4	5	5	6	4	5	3	5	4	5	4	6	5	4	6	4	6	1	2	6
2019-12-12 12:08:29	5	5	6	7	5	6	6	6	6	7	6	5	6	6	4	4	7	7	7	7	4	4	6	6	7	7	5	6	4	5	6	6	6	6	4	3	3	3	7	7	7	7	6	6	3	6	4	6	6
2019-12-12 12:12:51	7	7	7	7	7	7	6	4	7	7	7	7	6	6	6	6	7	7	7	7	7	7	7	7	7	7	7	7	7	7	7	6	6	5	6	6	5	5	7	7	6	7	7	7	6	7	5	5	7
2019-12-12 12:13:06	7	7	6	6	6	7	7	6	5	6	7	7	7	7	5	5	7	7	7	7	3	3	6	5	6	7	5	6	6	6	7	7	5	6	6	5	4	4	7	7	7	7	7	7	7	6	1	4	6
2019-12-12 12:17:40	7	7	7	7	7	7	5	5	6	7	7	7	7	7	4	4	6	6	7	7	3	3	7	6	7	7	7	6	2	2	6	6	7	6	1	1	2	2	7	6	7	7	7	6	2	6	2	2	6
2019-12-12 12:20:10	6	7	7	7	7	6	6	7	5	6	7	7	6	6	3	4	7	7	7	7	5	5	7	7	7	7	7	7	6	6	6	6	7	7	2	2	6	6	6	6	6	7	7	7	7	6	3	4	6
2019-12-12 12:22:32	6	6	6	6	5	5	5	5	7	7	6	7	6	5	6	7	7	7	6	6	6	6	7	7	6	6	5	6	5	4	6	6	5	6	5	4	4	4	6	6	7	7	6	6	4	6	3	3	6
2019-12-12 12:23:56	6	7	6	7	6	6	6	5	7	7	7	7	6	7	6	6	6	7	7	6	6	6	7	6	7	7	7	7	7	7	6	5	7	5	7	6	7	6	7	7	6	6	7	7	6	7	7	7	7
2019-12-12 13:49:16	6	7	7	7	7	7	6	6	6	7	6	6	6	7	6	7	7	7	6	6	6	7	7	7	7	7	7	7	6	7	7	7	7	7	6	6	6	6	7	7	7	7	7	7	7	7	5	7	7
2019-12-12 18:10:06	5	6	6	6	6	6	5	6	6	6	6	6	4	4	5	5	5	5	6	6	5	5	5	5	6	6	6	6	6	6	5	5	6	6	5	5	5	6	7	7	6	7	6	7	6	7	5	5	7
2019-12-12 19:33:14	6	6	6	7	7	7	6	6	6	6	7	7	6	6	7	7	7	7	7	7	6	6	4	5	6	6	6	6	7	6	6	6	6	7	7	6	6	6	7	7	5	7	5	6	6	6	6	6	6
2019-12-12 19:33:57	7	6	7	7	7	7	6	6	7	6	7	7	6	7	6	7	7	7	7	6	7	6	7	7	7	7	7	7	6	6	7	7	7	6	7	7	6	7	7	6	7	7	5	6	7	7	7	7	7
2019-12-12 19:37:41	6	6	7	7	7	7	5	5	6	6	7	7	5	5	6	6	6	7	6	7	7	7	7	7	7	7	4	6	5	6	7	6	6	7	6	7	6	7	6	6	7	6	7	6	5	7	5	5	6
2019-12-12 19:41:04	7	7	7	7	7	7	7	7	7	7	7	7	7	7	7	7	7	7	7	7	7	7	7	7	7	7	7	7	6	7	7	7	7	7	7	7	7	7	7	7	7	7	7	7	7	7	7	6	6
2019-12-12 19:41:20	7	7	7	7	7	7	7	7	7	7	7	7	5	5	6	6	7	7	6	6	7	7	7	7	7	7	7	7	7	7	7	7	6	6	7	7	7	7	7	7	7	7	6	7	7	7	7	7	7
2019-12-12 19:42:11	6	6	6	6	7	7	3	3	7	7	7	7	7	6	6	7	6	7	6	6	6	7	7	7	7	7	5	6	6	6	5	6	7	6	7	7	6	5	7	7	6	6	7	7	7	7	4	7	7
2019-12-12 19:45:59	6	6	6	6	6	6	6	6	6	7	7	7	7	6	5	6	7	6	5	6	6	6	6	6	6	6	6	7	6	6	5	6	6	7	6	7	7	7	6	6	6	7	7	7	7	4	5	5	7
2019-12-12 19:46:02	6	6	7	7	4	7	7	6	7	6	7	7	6	5	4	6	6	6	6	6	6	6	7	7	7	7	4	4	5	6	6	6	5	6	6	7	7	7	6	6	6	6	7	7	5	7	1	7	7
2019-12-12 19:51:16	6	7	6	7	6	6	6	6	7	7	7	7	7	7	6	6	7	7	6	7	6	7	7	7	7	7	6	6	6	6	6	6	6	7	7	7	7	7	6	6	6	6	7	6	7	7	5	5	7
2019-12-12 19:53:33	6	7	6	7	6	6	7	7	7	7	7	7	7	7	7	7	7	7	7	7	5	6	6	6	7	7	6	6	6	6	6	6	7	7	6	6	7	7	7	7	7	7	7	7	7	6	7	6	7
2019-12-12 19:54:46	7	7	7	7	6	5	5	6	6	7	7	7	5	7	5	6	5	7	6	7	6	5	5	7	7	7	5	7	6	6	7	7	7	6	5	4	7	6	7	7	7	6	5	6	7	7	7	7	7
2019-12-12 19:55:30	7	7	7	7	7	7	7	7	6	7	6	6	6	6	7	7	7	7	7	7	6	7	6	7	6	6	6	6	6	6	6	7	5	6	6	7	6	7	6	6	6	6	6	6	7	6	7	6	7
2019-12-12 19:57:43	7	6	7	7	7	7	7	7	6	6	6	6	6	6	6	7	7	7	7	7	6	6	6	6	6	6	7	7	7	6	6	6	6	7	7	7	6	6	5	7	7	6	6	7	7	6	6	3	7
2019-12-12 19:59:54	7	6	7	7	7	7	7	7	6	6	6	6	6	6	7	7	7	7	7	7	6	6	7	7	7	7	6	6	7	7	6	6	7	7	6	6	7	7	6	6	6	6	6	6	6	7	3	3	7
2019-12-12 20:02:53	5	7	6	7	5	7	6	5	6	7	6	7	5	7	5	7	6	7	7	7	5	6	6	7	6	7	6	7	6	7	6	7	5	6	5	6	5	6	6	7	7	7	7	7	7	7	4	4	7
2019-12-12 20:03:01	7	7	7	7	7	7	7	7	7	7	7	7	7	7	6	6	6	6	6	6	6	6	6	6	6	6	7	7	6	6	7	7	6	6	7	7	7	7	6	6	6	6	6	6	6	7	6	6	6
2019-12-12 20:05:14	7	7	7	7	7	7	7	7	6	6	7	7	7	7	6	6	6	6	6	6	7	7	7	7	7	7	6	6	6	6	6	6	7	7	7	7	6	6	6	6	6	6	6	6	6	6	2	5	7
2019-12-12 20:06:28	7	7	6	7	6	7	6	7	6	7	6	7	6	7	7	7	7	7	7	7	7	7	7	7	7	7	6	6	5	6	5	7	7	7	7	7	6	6	7	7	7	7	7	7	7	7	5	6	7
2019-12-12 20:06:49	7	7	7	7	6	7	6	6	7	7	6	6	6	7	6	6	7	7	6	6	7	7	7	7	6	6	7	7	7	6	7	7	7	6	6	7	6	6	7	7	6	7	6	7	7	7	7	7	7
2019-12-12 20:09:52	6	7	6	7	7	7	6	7	6	7	6	7	6	7	7	7	7	7	7	7	7	7	7	7	7	7	5	6	5	7	5	7	7	7	7	7	6	6	7	7	7	7	7	7	7	7	6	6	7
2019-12-12 20:14:30	5	7	6	7	6	6	6	7	7	7	7	7	7	7	7	7	6	7	7	7	7	7	7	7	7	7	6	7	6	7	7	7	6	7	7	7	7	7	7	7	7	7	7	7	7	7	6	6	7
2019-12-12 20:37:47	3	6	5	6	5	7	4	4	6	7	6	6	5	5	4	7	6	6	6	6	4	6	7	7	6	6	5	6	5	6	4	6	6	6	5	6	5	5	7	7	6	7	7	7	6	6	4	7	5
2019-12-12 22:44:40	5	6	7	7	7	7	5	7	6	7	6	6	6	7	5	5	4	5	5	5	6	7	7	6	7	7	5	4	4	5	5	5	6	6	7	7	6	7	7	6	6	7	7	7	7	5	6	6	7
2019-12-12 22:56:09	7	7	7	6	7	7	7	7	7	7	7	7	7	7	6	6	7	6	7	6	7	7	7	7	7	7	7	6	7	7	7	7	7	6	7	6	7	7	7	7	7	7	7	7	7	7	6	7	6
2019-12-12 22:56:16	7	7	7	6	7	7	7	7	7	7	7	7	7	7	6	6	7	6	7	6	7	7	7	7	7	7	7	6	7	7	7	7	7	6	7	6	7	7	7	7	7	7	7	7	7	7	6	7	6
2019-12-13 10:41:46	5	6	5	6	5	6	4	4	6	7	5	7	4	5	4	3	4	3	5	5	5	5	5	6	7	7	7	7	7	7	6	6	7	7	7	7	6	6	7	7	7	7	7	7	7	7	3	3	7
2019-12-13 11:51:20	5	7	5	7	5	7	5	7	6	7	5	7	6	7	6	7	6	7	7	7	6	6	7	7	7	7	5	7	6	7	6	6	6	7	7	6	6	7	7	7	7	7	7	7	7	7	4	5	7
2019-12-13 12:55:55	7	7	7	7	7	7	7	7	6	7	6	6	7	7	5	6	5	7	7	7	5	6	7	7	7	7	7	7	7	7	7	7	7	5	7	5	7	7	7	7	7	7	7	7	7	7	3	7	7
2019-12-13 12:57:55	7	7	7	7	5	7	7	7	6	6	7	7	7	7	7	7	7	7	7	7	6	6	6	7	7	7	7	7	7	6	7	7	6	4	7	7	7	7	7	7	7	7	7	7	7	7	3	7	7
2019-12-13 14:35:09	4	6	5	6	5	6	3	5	7	7	7	7	5	6	6	4	6	4	7	6	7	4	7	5	7	7	6	6	6	6	6	4	7	6	7	7	6	7	7	7	7	7	6	7	4	7	2	4	7
2019-12-13 14:42:51	5	6	7	5	7	5	6	4	7	7	7	7	7	4	7	4	7	4	7	6	7	4	7	4	7	7	6	7	5	7	6	5	7	7	6	7	7	7	6	6	6	6	6	7	4	6	1	3	7
2019-12-13 14:50:58	7	6	7	5	7	6	6	5	7	7	6	7	4	4	7	5	7	6	7	7	7	4	7	5	7	7	6	7	6	7	7	5	7	5	5	7	5	7	7	6	6	6	6	6	5	6	3	3	7
2019-12-13 15:07:25	5	6	5	5	5	6	5	4	7	7	6	7	7	4	7	4	6	6	6	6	6	4	7	5	6	7	6	7	7	7	7	5	6	6	5	7	6	7	7	7	5	6	6	7	3	7	1	2	7
2019-12-13 15:22:49	5	6	6	5	6	5	6	5	6	7	5	6	4	5	7	4	6	5	5	6	7	3	6	4	5	5	5	6	4	6	5	5	6	5	4	7	6	6	6	5	6	7	6	6	3	7	3	4	7
2019-12-13 17:44:20	5	6	6	5	6	6	6	5	7	7	6	7	7	4	7	5	7	5	6	6	7	4	7	4	6	6	5	7	5	7	6	5	6	6	5	7	5	7	7	7	7	7	7	7	7	7	4	5	7
2019-12-13 17:56:27	6	7	7	6	7	7	7	7	7	7	7	7	5	4	7	5	7	6	7	7	7	5	7	5	7	7	6	7	6	7	7	5	7	7	6	7	6	7	7	7	7	7	7	7	6	7	4	5	7
2019-12-13 18:29:24	5	6	7	5	6	4	5	4	6	7	6	6	6	4	6	4	6	4	7	6	7	5	7	4	7	7	7	5	7	6	6	5	6	6	5	7	5	7	6	5	5	5	5	6	4	6	1	2	6
2019-12-13 18:36:38	5	6	7	4	6	5	6	4	6	7	5	6	5	4	5	4	6	4	6	6	6	5	6	4	6	6	6	6	6	6	6	5	6	6	5	7	5	7	6	6	5	6	5	6	4	6	2	3	7
2019-12-13 18:47:23	7	7	7	6	7	7	6	5	7	7	7	7	5	4	7	5	7	6	7	7	7	5	7	5	7	7	6	7	6	7	7	5	6	7	5	7	5	7	7	7	7	7	7	7	7	7	3	5	7
2019-12-13 18:52:49	6	6	7	7	7	7	5	5	7	7	6	6	7	6	6	6	7	6	6	6	7	7	7	7	6	6	6	6	6	7	7	7	6	6	6	6	6	7	7	6	6	6	6	6	7	7	7	7	7
2019-12-13 18:53:31	6	7	7	7	7	7	7	7	7	7	7	7	7	7	6	6	7	7	7	7	7	7	7	7	7	7	7	7	7	5	7	7	7	6	7	5	5	5	7	7	7	7	7	7	6	7	7	7	7
2019-12-13 19:22:55	7	7	7	7	7	7	7	7	7	7	7	7	7	7	7	7	7	7	7	7	7	7	7	7	7	7	7	7	7	7	7	7	7	7	7	7	7	7	7	7	7	7	7	7	7	7	7	7	7
2019-12-13 19:26:25	6	5	5	5	4	4	4	4	7	7	7	7	7	6	5	5	5	5	6	6	7	7	7	7	7	7	6	6	6	6	6	6	2	2	2	2	2	2	7	7	7	7	6	7	7	7	6	4	7
2019-12-13 19:29:48	6	7	7	7	6	6	5	5	7	7	6	7	6	6	7	7	5	5	6	6	7	7	5	5	6	5	6	7	7	7	7	7	5	4	4	4	4	4	7	7	7	7	7	7	7	7	7	7	7
2019-12-13 19:33:17	7	7	7	7	7	6	5	5	7	7	7	7	7	7	5	5	5	5	6	6	3	4	6	6	6	6	7	7	5	5	5	5	5	5	5	5	5	5	7	7	7	7	7	7	7	6	7	7	7
2019-12-13 20:51:02	5	5	6	5	5	4	5	3	6	6	4	5	5	2	6	5	7	7	5	5	6	6	6	7	5	3	5	4	5	3	5	6	5	2	5	3	6	4	5	3	5	4	2	5	5	5	1	1	5
2019-12-13 20:55:33	6	5	7	5	6	4	5	5	5	5	6	6	5	3	6	4	7	7	6	4	6	3	6	6	7	6	6	7	6	5	6	6	5	3	5	6	5	3	6	6	7	5	3	5	5	7	1	1	6
2019-12-13 22:19:45	6	7	7	7	6	6	7	7	6	6	7	6	6	6	6	7	7	7	7	7	6	7	7	6	6	7	6	6	7	7	6	7	6	7	7	7	7	7	6	7	6	7	7	7	7	7	7	7	7
2019-12-13 22:52:08	6	7	6	6	7	7	5	4	7	7	5	7	5	4	6	5	6	4	7	7	7	5	6	4	6	7	6	7	6	7	6	6	7	7	5	7	5	7	7	7	5	7	6	6	4	7	2	4	7
2019-12-13 22:57:59	6	6	7	7	7	7	5	5	7	7	7	7	6	5	6	5	6	5	6	7	6	4	7	5	7	7	7	7	7	7	7	6	7	7	7	7	6	7	7	7	7	7	7	7	7	7	3	4	7
2019-12-14 00:20:12	4	6	5	7	5	6	3	6	7	7	5	7	3	3	5	5	6	6	5	6	6	6	5	7	7	7	6	6	6	5	6	7	5	6	6	5	5	6	7	7	6	7	7	7	5	7	6	7	7
2019-12-14 12:53:42	6	7	7	7	7	7	7	7	7	7	7	7	3	6	5	6	6	6	7	6	7	7	6	6	6	6	7	7	7	7	7	7	6	6	5	6	6	7	7	7	7	7	7	7	7	7	7	7	7
2019-12-14 12:59:01	5	5	5	5	5	5	5	5	2	3	3	4	4	4	5	5	6	6	6	6	4	4	5	4	4	6	4	3	5	5	4	4	3	4	4	3	4	5	7	7	6	7	7	6	6	6	6	7	7
2019-12-14 12:59:30	7	6	7	7	7	6	4	4	7	7	6	6	5	4	6	7	7	7	7	7	7	6	7	7	7	7	6	5	7	7	7	7	6	5	6	6	6	5	7	7	6	6	6	6	6	7	4	6	7
2019-12-14 12:59:48	5	6	6	6	4	6	3	5	5	6	6	6	4	4	4	4	5	6	6	6	4	5	6	7	7	7	5	6	5	6	6	6	5	6	5	4	3	3	6	6	6	7	5	5	6	6	4	2	6
2019-12-14 13:01:24	6	6	7	7	5	6	6	5	7	7	7	6	6	6	5	5	4	4	6	5	6	6	7	7	7	6	7	7	7	7	6	6	6	7	5	5	5	5	7	7	7	7	6	7	7	7	7	7	7
2019-12-14 13:01:29	5	5	5	5	5	5	5	5	6	6	5	5	5	5	6	6	6	6	5	5	6	6	5	5	7	7	6	6	5	5	7	7	6	4	4	5	5	4	7	7	6	7	5	7	7	6	4	4	6
2019-12-14 13:02:00	5	4	6	6	5	6	5	5	6	6	5	6	3	4	5	6	5	6	4	7	4	5	5	6	5	6	5	7	6	7	5	5	5	6	5	4	5	6	6	6	7	7	5	6	5	6	6	5	7
2019-12-14 13:02:02	7	7	6	6	6	7	5	5	3	4	4	4	6	5	6	6	7	7	5	5	5	5	6	4	5	5	4	4	5	6	5	5	3	4	3	4	5	6	4	4	6	5	5	5	4	4	5	5	4
2019-12-14 13:05:12	7	7	7	7	6	7	3	7	7	7	7	7	5	7	7	7	7	6	7	7	7	7	6	7	7	7	7	7	7	7	7	7	7	7	7	7	7	7	7	7	7	7	7	7	7	7	7	7	7
2019-12-14 13:05:25	7	7	7	7	7	7	7	7	7	7	7	7	7	7	5	5	5	5	5	5	6	6	6	6	6	6	6	6	6	6	6	6	5	5	5	5	5	5	7	7	7	7	7	7	7	7	7	7	7
2019-12-14 13:06:04	5	6	4	6	5	7	6	7	5	6	5	7	4	5	5	6	4	6	5	4	4	4	5	6	5	5	5	6	4	5	3	2	5	5	3	5	6	6	6	5	4	6	4	6	4	4	4	3	5
2019-12-14 13:06:38	5	4	5	3	4	4	5	4	7	7	6	6	6	4	5	4	5	5	4	2	5	5	5	5	5	5	5	5	4	3	3	3	5	3	4	4	4	3	6	6	6	6	6	6	6	7	6	6	7
2019-12-14 13:07:05	6	6	6	6	6	6	6	6	6	6	6	6	6	6	6	6	6	6	6	6	6	6	6	6	6	6	6	6	6	6	6	6	6	6	6	6	6	6	6	6	6	6	6	6	6	6	6	6	6
2019-12-14 13:10:08	5	6	6	6	5	5	5	6	4	6	5	7	5	6	5	6	5	5	4	6	6	6	5	5	4	7	4	5	5	5	6	7	5	6	5	5	4	5	6	6	4	7	5	5	5	6	4	4	6
2019-12-14 13:11:56	7	7	7	7	6	7	6	7	5	7	7	7	5	6	6	6	7	7	7	7	6	5	6	7	7	7	5	6	6	7	6	7	7	7	7	7	7	7	7	7	7	7	7	7	7	7	7	6	7
2019-12-14 13:13:39	4	6	5	6	5	5	5	4	6	6	5	7	3	5	4	5	4	5	6	6	4	6	5	5	3	7	5	6	4	4	5	6	5	6	5	5	4	6	5	6	4	6	6	6	5	5	6	5	6
2019-12-14 13:13:46	6	6	7	6	6	6	6	6	7	7	7	7	7	7	6	6	7	7	6	7	6	6	7	6	7	6	6	6	6	6	5	5	7	6	6	6	6	6	7	6	7	7	7	7	7	7	4	6	7
2019-12-14 13:14:03	3	3	4	4	4	4	3	3	4	4	5	5	4	4	4	4	3	3	3	3	3	4	4	4	5	5	4	4	5	5	4	3	3	4	5	4	3	4	6	6	5	5	6	6	5	7	7	6	7
2019-12-14 13:14:40	1	1	1	1	1	1	1	1	1	1	1	1	1	1	1	1	1	1	1	1	1	1	1	1	1	1	1	1	1	1	1	1	1	1	1	1	1	1	1	1	1	1	1	1	1	1	1	1	1
2019-12-14 13:17:12	6	7	7	7	5	6	5	5	6	7	5	7	4	5	6	6	5	6	5	7	6	7	5	5	6	7	6	6	4	5	6	6	5	5	4	5	5	6	6	7	6	6	5	6	6	7	7	5	6
2019-12-14 13:17:43	7	7	7	7	7	7	7	7	6	7	6	7	5	6	5	6	5	6	6	7	4	7	4	6	6	7	5	6	5	6	6	7	7	7	5	6	6	6	7	7	7	7	7	7	7	7	7	7	7
2019-12-14 13:20:51	5	5	6	7	5	6	4	4	6	7	5	6	4	4	4	4	4	3	4	5	4	5	4	4	5	6	3	4	3	3	3	4	4	5	4	5	5	4	5	5	5	5	4	3	5	3	4	4	5
2019-12-14 13:21:23	5	5	5	6	4	5	4	6	4	6	4	5	4	3	3	4	5	6	4	5	3	5	5	6	4	6	3	4	5	5	3	4	4	4	5	4	3	4	5	5	4	5	4	5	4	5	3	2	4
2019-12-14 13:21:48	4	4	7	7	7	7	6	6	7	7	6	5	6	6	5	6	7	7	6	5	4	5	5	4	5	6	4	4	6	7	6	6	5	5	7	6	6	6	6	6	5	7	5	6	6	6	7	6	7
2019-12-14 13:23:18	7	7	7	7	7	7	5	4	7	7	6	6	4	3	5	4	3	3	4	4	5	3	6	5	6	6	5	4	6	5	6	5	4	4	4	3	6	5	7	7	7	7	7	7	7	7	7	7	7
2019-12-14 13:24:01	4	4	5	5	4	4	5	5	5	5	5	5	4	4	4	4	4	4	4	4	5	4	4	4	4	4	4	4	4	4	4	4	5	4	3	3	3	3	4	5	4	6	2	3	4	6	2	3	3
2019-12-14 13:24:52	5	6	6	6	5	7	5	5	6	7	5	6	5	6	5	6	6	6	5	7	5	6	6	7	4	7	6	6	5	5	4	6	6	5	5	5	6	6	6	7	6	6	7	6	5	6	5	5	7
2019-12-14 13:25:08	7	5	7	7	6	5	6	5	5	6	5	7	5	6	5	6	3	4	4	4	7	6	7	7	6	7	6	7	5	6	6	6	7	6	6	6	5	5	6	7	6	6	7	6	5	6	7	7	7
2019-12-14 13:25:50	6	5	3	7	4	6	5	3	6	7	5	4	6	3	5	7	7	7	6	5	7	7	6	5	7	6	7	5	6	6	5	7	4	4	5	4	6	5	6	6	5	4	7	6	6	6	2	2	7
2019-12-14 13:27:07	6	6	7	7	5	6	4	5	7	7	5	6	5	5	4	6	5	5	5	6	6	7	7	5	7	7	6	7	6	6	5	6	4	6	5	6	5	5	6	6	7	6	6	6	5	7	5	5	7
2019-12-14 13:27:52	5	6	5	5	4	6	5	6	7	6	6	6	4	5	5	5	4	6	5	6	5	6	5	7	6	7	5	6	6	6	5	6	5	4	5	5	4	4	5	6	6	5	4	5	5	6	5	5	6
2019-12-14 13:28:37	5	5	5	5	5	5	5	5	6	5	6	5	6	5	5	5	4	5	5	6	4	5	6	5	5	6	6	6	5	6	6	6	4	6	5	5	5	6	7	6	6	6	7	5	3	7	6	6	7
2019-12-14 13:30:49	4	6	5	6	5	5	4	5	6	6	6	6	5	4	5	6	4	6	5	5	5	6	5	7	4	6	5	5	4	5	6	5	6	5	4	5	5	5	6	6	5	5	6	6	5	6	4	4	6
2019-12-14 13:31:04	7	7	7	7	7	7	5	5	7	6	7	6	7	7	7	7	5	5	7	7	7	7	7	7	7	7	7	6	6	6	7	7	5	5	6	6	7	7	7	7	7	7	6	6	7	7	7	6	7
2019-12-14 13:32:17	7	7	7	7	7	7	7	7	7	7	7	7	7	7	7	7	7	7	7	7	7	7	7	7	7	7	7	7	7	7	7	7	7	7	7	7	7	7	7	7	7	7	7	7	7	7	7	7	7
2019-12-14 13:33:31	6	7	6	7	6	6	6	6	5	7	6	7	5	6	5	6	5	5	6	6	6	5	6	6	5	6	6	6	5	6	4	5	6	5	5	5	6	6	6	7	6	6	6	7	5	7	6	5	7
2019-12-14 13:39:39	6	6	6	6	7	7	6	6	7	7	7	7	7	7	5	5	5	5	6	6	6	6	7	7	6	6	7	7	6	6	6	6	5	5	6	6	7	7	6	6	6	6	5	7	7	7	7	5	7
2019-12-14 14:19:35	7	6	7	7	7	7	7	6	7	7	7	6	5	5	7	6	7	7	6	5	7	5	7	6	6	6	5	5	6	6	7	6	5	5	5	4	4	3	7	6	7	7	4	6	6	7	3	7	7
2019-12-14 14:46:07	4	4	5	5	4	4	5	5	5	5	5	5	4	4	4	4	4	4	4	4	5	4	4	4	4	4	4	4	4	4	4	4	5	4	3	3	3	3	4	5	4	6	2	3	4	6	2	3	3
2019-12-14 15:19:20	7	6	7	7	6	7	7	7	7	7	7	7	6	6	6	7	7	7	7	7	6	7	6	7	6	7	5	7	6	7	7	7	7	6	6	7	7	7	7	7	6	7	7	7	7	7	7	6	7
2019-12-14 15:19:24	7	7	6	7	6	6	5	5	7	7	6	7	5	6	6	5	5	5	6	5	6	6	6	6	7	7	7	7	7	7	7	7	7	6	6	6	7	5	6	7	6	6	7	7	7	7	4	5	6
2019-12-14 15:23:18	6	6	7	7	6	7	7	6	6	7	7	6	7	7	7	6	6	7	7	7	6	6	7	7	7	6	7	6	7	6	7	6	7	6	6	7	7	6	6	6	5	6	6	7	7	6	6	7	6
2019-12-14 15:33:23	7	7	7	7	7	7	5	4	6	7	7	6	5	4	6	6	6	7	7	7	4	7	7	6	7	7	7	7	7	6	7	7	7	7	7	7	7	7	6	7	7	7	7	7	7	7	7	7	7
2019-12-14 16:06:19	5	6	6	7	4	6	3	3	5	7	5	7	2	3	5	5	3	4	6	5	6	7	7	7	6	7	4	6	6	3	6	3	7	6	7	5	4	6	6	7	2	6	3	5	2	5	1	2	6
2019-12-14 16:21:54	4	7	5	7	7	7	2	2	7	7	7	7	3	7	5	7	7	7	7	6	7	7	7	7	7	7	7	7	7	7	7	7	7	3	7	7	7	7	7	7	7	7	7	7	7	7	7	7	7
2019-12-14 16:24:18	6	6	6	6	6	6	5	5	6	7	6	7	7	7	7	7	7	7	7	7	7	7	7	7	7	7	7	7	7	7	7	7	7	7	7	7	7	7	7	7	7	7	7	7	7	7	7	7	7
2019-12-14 16:26:11	5	7	7	7	7	7	6	6	7	7	7	7	7	7	7	7	7	7	7	7	7	7	7	7	7	7	7	7	7	7	7	7	7	7	7	7	7	7	7	7	7	7	7	7	7	7	7	7	7
2019-12-14 16:27:37	7	7	7	7	7	7	2	2	7	7	7	7	7	7	7	7	7	7	7	7	7	7	7	7	7	7	7	7	7	7	7	7	7	7	7	7	7	7	7	7	7	7	7	7	7	7	7	7	7
2019-12-14 16:29:47	7	7	7	7	7	7	5	5	7	7	7	7	7	7	6	7	5	7	7	7	6	7	6	7	7	7	7	7	7	7	7	7	7	7	7	7	7	7	7	7	7	7	7	7	7	7	7	7	7
2019-12-14 16:30:00	4	5	5	6	3	3	4	5	3	4	5	5	3	1	4	2	5	7	5	2	6	5	7	6	5	5	6	7	5	4	6	6	6	3	5	5	6	4	5	4	6	4	5	6	4	7	1	2	7
2019-12-14 16:36:22	7	5	6	5	4	6	6	5	7	6	6	5	5	4	6	6	6	7	6	4	6	5	7	5	6	6	7	5	6	5	6	6	6	5	7	6	4	6	7	6	7	5	5	6	5	7	1	3	6
2019-12-14 16:41:30	6	5	5	4	6	6	5	5	7	5	6	5	5	2	6	6	5	6	6	5	6	6	5	7	7	6	7	5	7	6	6	7	6	5	5	3	5	6	6	5	5	3	4	5	2	6	1	1	6
2019-12-14 16:49:21	5	5	6	6	5	7	6	5	7	6	6	5	5	3	6	7	6	6	5	3	6	6	7	7	7	5	6	5	7	5	6	6	6	5	6	4	5	6	5	5	6	6	4	5	2	6	1	3	7
2019-12-14 16:50:36	5	4	5	7	7	5	5	7	7	6	5	6	5	6	4	5	4	5	5	5	6	6	7	7	7	6	5	6	5	5	5	7	7	6	6	7	7	7	4	5	5	6	6	6	6	6	6	5	6
2019-12-14 17:30:35	5	7	6	7	6	7	6	6	6	7	5	7	5	4	5	3	5	5	6	6	5	5	6	6	7	7	6	6	5	6	5	5	6	6	6	5	5	6	7	7	7	7	6	7	5	6	5	5	6
2019-12-14 17:32:12	5	7	6	7	5	6	6	5	7	6	7	6	7	6	5	5	5	6	6	6	7	7	6	7	7	6	7	7	6	6	6	7	6	5	7	6	5	5	6	5	6	7	5	6	5	6	7	6	6
2019-12-14 17:34:12	5	5	5	5	6	6	5	5	5	5	6	6	6	6	7	7	7	7	7	7	6	7	7	7	6	7	5	7	6	7	6	6	7	5	6	6	7	7	5	5	6	5	5	5	4	6	7	4	5
2019-12-14 17:34:54	6	7	6	7	7	7	6	6	7	7	7	7	7	7	7	7	7	7	7	7	7	7	7	7	7	7	7	7	7	7	7	7	7	7	7	7	7	7	7	7	7	7	7	7	7	7	7	7	7
2019-12-14 17:36:06	5	6	7	6	5	7	5	6	6	5	6	7	6	7	7	6	5	6	7	6	5	6	5	6	7	6	7	6	5	6	7	6	6	7	6	7	6	6	6	6	7	7	7	7	7	7	6	5	5
2019-12-14 17:38:02	6	6	6	6	7	7	5	5	5	6	5	6	5	5	7	7	7	7	7	7	7	7	7	7	7	7	6	6	5	4	5	5	6	6	6	6	6	6	7	7	7	7	7	7	7	7	7	4	7
2019-12-14 17:42:00	6	6	7	7	7	7	5	5	6	6	6	6	6	6	5	6	5	6	5	5	5	5	5	5	6	7	5	5	5	5	6	6	5	6	6	6	6	6	6	7	7	7	6	7	6	6	5	5	6
2019-12-14 17:46:35	3	4	4	5	4	4	4	4	5	5	5	5	4	5	3	3	4	4	4	4	4	4	5	5	5	5	4	5	5	4	5	5	4	5	5	4	5	5	5	5	5	5	5	5	5	5	4	3	5
2019-12-14 17:59:47	6	7	6	6	6	7	7	7	6	6	6	7	6	6	7	7	6	5	5	5	6	6	6	5	5	5	7	7	7	7	7	7	5	6	7	7	6	5	7	6	5	5	6	7	7	6	7	6	7
2019-12-14 18:07:54	2	2	2	2	2	2	2	1	7	6	6	6	5	1	6	6	6	6	6	5	6	5	6	6	6	6	7	5	7	5	7	6	6	5	7	5	6	5	7	7	6	7	7	6	5	7	7	7	7
2019-12-14 18:14:33	6	6	6	6	5	5	4	5	6	6	7	7	5	5	6	6	6	6	7	7	7	7	7	7	7	7	7	7	7	7	7	7	6	6	5	5	6	6	6	6	6	6	5	7	5	7	5	7	5
2019-12-14 18:26:03	3	3	3	2	3	2	3	3	3	4	5	3	3	4	5	6	5	4	6	5	5	6	5	6	7	6	6	7	6	5	5	5	6	6	6	5	6	7	6	6	6	5	5	6	6	5	6	7	6
2019-12-14 18:33:29	7	7	7	7	7	7	6	6	7	7	7	7	7	7	7	7	7	7	7	7	7	7	7	7	7	7	7	7	7	7	7	7	7	7	7	7	7	7	7	7	7	7	7	7	7	7	7	7	7
2019-12-14 18:36:46	7	7	7	7	7	7	6	6	7	7	7	7	7	7	7	7	7	7	7	7	7	7	7	7	7	7	7	7	7	7	7	7	7	7	7	7	7	7	7	7	7	7	7	7	7	7	7	7	7
2019-12-14 18:36:52	5	6	6	6	5	7	6	5	6	7	7	7	6	7	6	6	7	5	6	7	6	6	6	7	7	6	5	6	7	6	5	6	7	6	5	6	7	6	6	7	6	6	6	7	6	7	7	6	7
2019-12-14 18:38:11	7	7	7	7	7	7	7	7	7	7	7	7	7	7	7	7	7	7	7	7	7	7	7	7	7	7	7	7	7	7	7	7	7	7	7	7	7	7	7	7	7	7	7	7	7	7	7	7	7
2019-12-14 18:39:44	7	7	7	7	7	7	1	1	7	7	7	7	7	7	7	7	7	7	7	7	7	7	7	7	7	7	7	7	7	7	7	7	7	7	7	7	7	7	7	7	7	7	7	7	7	7	7	7	7
2019-12-14 18:40:21	7	7	7	7	7	7	7	7	6	5	6	7	6	7	6	7	6	7	6	6	7	7	7	6	6	7	6	7	7	6	7	7	6	6	7	7	6	7	6	7	6	7	7	6	6	7	6	6	7
2019-12-14 18:42:00	7	7	7	7	7	7	2	2	5	6	5	5	6	6	5	6	5	7	5	6	7	7	7	7	5	7	7	7	7	7	7	7	5	2	7	7	7	7	7	7	7	7	7	7	7	7	1	1	7
2019-12-14 18:42:50	7	6	6	5	6	7	6	7	7	6	7	6	6	7	7	5	4	6	6	7	5	6	7	6	5	6	6	7	6	7	6	7	6	6	5	7	6	7	7	6	6	7	6	5	6	6	5	6	6
2019-12-14 18:44:16	2	7	5	7	5	6	1	1	5	6	6	6	5	6	5	7	5	7	5	7	6	6	7	7	6	7	7	7	7	7	6	6	7	2	7	7	7	7	7	7	7	7	7	7	7	6	1	1	6
2019-12-14 18:45:45	7	7	7	7	7	7	5	5	7	7	7	7	7	7	7	7	7	7	7	7	7	7	7	7	7	7	7	7	7	7	7	7	7	7	7	7	7	7	7	7	7	7	7	7	7	7	7	7	7
2019-12-14 18:47:19	7	7	7	7	7	7	6	6	7	7	7	7	7	7	7	7	7	7	7	7	7	7	7	7	7	7	7	7	7	7	7	7	7	7	7	7	7	7	7	7	7	7	7	7	7	7	7	7	7
2019-12-14 18:48:56	7	7	7	7	7	7	7	7	7	7	7	7	7	7	7	7	7	7	7	7	7	7	7	7	7	7	7	7	7	7	6	6	7	5	7	7	7	7	7	7	7	7	7	7	7	7	7	7	7
2019-12-14 19:28:12	7	6	7	6	6	6	7	7	7	6	6	6	7	7	6	7	7	6	6	5	6	6	7	6	6	6	6	7	6	6	7	7	7	6	5	5	6	6	6	7	6	6	7	6	7	6	7	6	6
2019-12-14 19:30:00	5	5	5	6	5	6	6	6	5	6	5	5	6	6	6	5	6	7	6	7	6	5	6	5	5	5	6	5	6	6	6	5	7	6	5	6	6	5	6	5	6	6	5	6	5	6	7	6	5
2019-12-14 19:31:59	6	6	7	6	7	6	6	6	6	7	6	7	6	7	6	5	6	5	6	5	6	5	6	5	6	5	7	6	5	4	5	6	6	5	6	5	6	5	6	6	5	6	5	6	5	6	5	6	6
2019-12-14 19:33:27	6	7	6	7	6	6	6	7	6	6	7	6	5	6	4	5	5	5	6	7	5	6	7	6	5	6	7	5	6	7	6	5	5	6	5	6	5	6	6	7	5	6	5	6	6	6	6	7	6
2019-12-14 20:11:11	4	5	5	5	4	5	3	3	7	7	7	7	5	6	6	7	7	6	7	7	6	7	7	7	7	7	6	6	6	6	7	7	5	6	5	6	6	7	7	7	7	7	7	7	6	7	2	2	7
2019-12-14 21:02:12	5	5	5	5	5	5	5	5	6	6	5	5	5	5	6	6	6	6	5	5	6	6	5	5	7	7	6	6	5	5	7	7	6	4	4	5	5	4	7	7	6	7	5	7	7	6	4	4	6
2019-12-15 09:51:41	6	7	7	7	6	6	5	5	7	7	6	6	6	7	6	7	6	7	6	6	6	6	7	7	7	7	6	6	7	7	7	7	6	7	7	7	7	7	7	7	7	7	7	7	7	7	7	7	7
2019-12-15 09:54:38	6	7	7	7	6	7	5	6	7	7	7	7	4	4	6	6	7	7	7	7	7	7	7	7	7	7	6	6	4	6	7	7	6	6	6	6	6	7	7	7	7	7	7	7	6	7	1	1	7
2019-12-15 09:59:02	6	7	7	7	7	6	7	5	7	7	5	7	7	4	7	7	7	7	7	7	7	7	7	7	7	7	7	7	7	5	7	7	7	6	4	4	7	7	7	7	6	7	7	7	7	7	2	1	7
2019-12-15 10:08:12	7	7	7	7	7	7	7	5	7	7	7	7	7	1	7	7	7	7	7	7	7	7	7	7	7	7	7	7	7	5	7	7	7	5	5	7	7	7	7	7	7	7	7	7	7	7	1	5	7
2019-12-15 10:12:01	7	7	7	7	5	7	7	2	7	7	7	7	7	2	7	7	7	7	7	7	7	5	7	5	7	7	7	7	7	5	7	7	7	6	6	6	7	7	7	7	6	7	7	7	7	7	6	7	7
2019-12-15 10:14:57	7	7	7	7	6	7	7	6	7	7	7	7	7	2	7	7	7	7	7	7	7	5	7	7	6	7	6	6	6	7	7	6	7	6	5	6	7	7	7	7	7	7	7	7	7	7	7	7	7
2019-12-15 10:36:31	6	6	7	7	7	7	7	7	7	7	7	7	6	6	5	5	7	7	6	6	7	7	7	6	6	6	6	6	7	7	6	6	6	6	7	7	7	7	7	7	7	7	7	7	7	7	7	7	7
2019-12-15 10:52:33	4	7	6	7	5	7	5	6	7	7	6	7	6	6	5	6	4	6	4	5	4	6	6	7	5	7	4	6	6	7	5	7	6	7	6	7	6	7	7	7	7	7	7	7	7	7	7	7	7
2019-12-15 11:13:32	6	6	7	7	5	6	5	6	7	7	6	7	5	6	5	6	6	6	6	5	7	7	7	7	7	7	5	6	6	5	7	7	5	6	5	5	5	4	7	7	7	7	7	7	6	7	7	5	7
2019-12-15 11:52:05	5	5	6	6	5	6	6	5	7	7	7	7	7	7	5	6	5	5	4	6	5	5	5	5	5	6	4	5	5	5	6	5	5	5	5	5	5	5	6	5	6	7	6	7	6	6	5	3	6
2019-12-15 11:55:33	5	6	4	6	5	7	5	5	5	5	6	6	5	5	6	6	5	6	6	5	5	5	6	5	6	7	6	6	5	6	7	6	5	6	5	5	4	5	4	5	5	6	5	4	5	5	5	5	5
2019-12-15 11:55:40	5	5	6	6	5	4	5	6	7	7	7	7	6	6	5	5	4	4	7	7	5	5	5	5	7	7	5	4	5	5	5	5	4	3	3	3	4	4	5	5	6	6	6	5	6	7	7	7	7
2019-12-15 11:59:07	4	6	5	5	5	5	6	6	5	6	5	5	5	5	6	6	5	6	5	4	5	5	5	5	5	6	5	6	5	5	4	4	4	5	4	4	5	5	5	5	6	5	4	6	6	5	5	5	5
2019-12-15 12:02:48	4	5	5	5	5	6	5	6	5	5	4	5	3	4	4	4	5	5	4	6	5	5	5	5	4	4	5	5	6	5	5	6	4	5	4	4	5	5	5	5	5	5	5	5	5	5	6	6	5
2019-12-15 12:20:20	5	6	6	6	5	5	6	6	5	5	5	6	5	6	6	6	6	6	6	6	5	5	5	6	6	6	6	6	6	6	6	6	5	6	6	5	6	6	6	6	6	7	7	7	7	6	6	6	6
2019-12-15 12:20:34	7	7	7	7	6	7	7	5	7	7	7	7	6	2	7	7	7	7	7	7	3	3	3	3	3	3	6	6	6	6	7	7	6	6	6	6	6	7	7	7	7	7	7	7	7	7	1	1	7
2019-12-15 12:24:14	6	6	4	6	5	5	5	5	5	5	5	6	5	6	5	5	4	5	5	6	5	6	6	7	7	7	6	5	4	5	5	4	5	5	6	5	4	6	6	5	6	5	6	6	6	6	6	4	6
2019-12-15 12:33:28	5	6	7	7	6	6	5	4	7	7	6	5	6	6	5	4	5	5	5	3	5	5	6	7	6	6	5	4	5	5	6	6	5	5	6	5	6	4	6	6	5	6	6	7	5	7	7	7	7
2019-12-15 12:42:40	5	5	6	5	6	6	6	6	5	5	4	5	5	6	5	5	5	6	5	6	5	4	5	5	5	6	4	5	6	6	6	6	6	6	6	6	6	6	5	4	5	4	5	5	5	5	4	3	5
2019-12-15 12:45:37	4	5	4	5	4	6	4	4	4	5	4	5	4	4	5	4	5	5	5	5	5	5	5	5	5	5	4	5	4	5	4	4	4	5	4	4	5	5	5	5	5	5	5	6	6	5	3	2	5
2019-12-15 12:48:49	4	5	4	5	4	5	4	3	4	4	5	5	4	5	4	5	5	5	5	5	4	5	4	5	4	5	4	4	4	4	5	5	5	5	5	5	5	6	6	6	6	6	6	6	6	6	5	3	6
2019-12-15 12:56:40	4	5	4	5	4	4	4	3	4	5	5	5	4	5	4	5	5	5	5	5	4	4	4	5	5	5	5	5	5	5	5	5	4	5	5	5	5	5	4	5	4	5	4	5	4	4	5	5	5
2019-12-15 13:08:44	6	7	7	7	6	7	7	5	6	7	5	7	6	6	5	6	6	7	7	7	6	7	6	7	7	7	7	7	6	6	6	7	6	6	7	6	6	7	7	7	7	6	6	7	7	7	5	6	7
2019-12-15 13:48:16	6	3	7	7	5	5	6	6	5	5	5	5	5	5	5	3	4	4	2	2	4	4	4	4	5	5	5	5	5	4	4	4	4	4	4	5	4	4	5	5	4	4	4	4	4	3	3	3	3
2019-12-15 14:45:48	6	7	7	7	6	7	4	7	7	7	7	7	5	7	7	7	7	7	7	7	7	7	7	7	7	7	6	6	7	7	7	7	6	7	6	7	7	7	7	7	7	7	7	7	7	7	1	2	7
2019-12-15 14:48:44	6	7	7	7	7	7	7	7	6	6	7	7	5	7	6	6	7	7	7	7	7	7	7	7	7	7	6	6	7	7	7	7	5	5	7	7	7	7	7	7	7	7	7	7	7	7	3	3	7
2019-12-15 14:51:25	7	7	7	7	7	7	7	7	7	7	7	7	7	7	7	7	7	7	7	7	5	5	6	6	7	7	6	6	6	6	6	6	4	6	7	6	6	7	7	7	7	7	7	7	7	6	2	1	7
2019-12-15 14:53:40	6	6	7	7	6	6	5	7	7	7	6	7	4	6	6	6	6	6	6	6	6	6	6	6	6	6	7	7	7	5	6	6	6	7	5	5	6	6	7	7	6	7	7	7	6	7	6	7	7
2019-12-15 15:01:05	2	6	5	7	7	3	3	3	7	7	7	7	2	2	2	2	6	6	7	6	6	4	7	7	7	7	6	7	7	7	7	7	4	5	5	6	7	7	6	6	7	7	6	7	7	7	3	6	7
2019-12-15 15:03:47	7	7	6	7	7	5	7	4	6	7	7	7	2	2	5	6	5	5	7	5	7	4	5	6	7	7	6	7	6	5	5	6	4	3	3	3	2	4	7	7	7	7	7	7	5	7	2	6	7
2019-12-15 15:06:18	7	6	5	5	6	6	6	5	7	7	6	7	7	4	3	5	5	5	7	7	6	5	6	5	5	6	4	4	5	6	6	7	7	7	7	7	6	7	7	7	6	5	6	6	7	7	6	7	7
2019-12-15 15:08:27	7	7	6	7	7	6	6	7	7	7	6	7	6	6	4	5	5	5	6	6	6	5	5	6	6	7	6	6	6	7	7	6	6	7	7	7	6	7	7	7	5	6	6	7	7	7	4	7	7
2019-12-15 15:10:11	3	6	6	6	7	5	5	6	7	7	7	7	5	7	7	6	7	5	6	7	7	7	5	6	7	5	7	7	6	7	6	7	7	7	7	7	7	6	7	7	6	7	6	6	7	7	7	7	7
2019-12-15 15:11:58	7	5	6	7	6	6	7	7	7	5	6	7	5	7	6	6	7	5	6	7	7	7	7	5	6	7	7	7	6	6	7	6	7	7	7	6	7	7	7	7	7	5	4	6	6	6	1	6	7
2019-12-15 15:13:59	7	6	6	7	6	7	6	7	4	3	7	5	7	7	5	6	7	7	7	5	6	6	5	7	7	7	7	7	6	7	7	6	7	6	7	7	6	7	7	7	7	5	6	5	7	7	6	7	6
2019-12-15 15:16:06	7	6	7	7	5	4	6	4	7	7	6	5	4	6	5	4	5	4	6	6	5	5	4	5	4	6	6	6	7	6	6	7	7	5	6	7	7	6	7	7	7	7	7	7	7	7	5	7	7
2019-12-15 15:17:42	7	5	7	7	7	6	6	7	6	7	7	6	7	7	7	6	7	7	6	7	7	6	6	7	6	7	7	7	6	5	6	6	7	7	5	6	7	7	7	7	7	6	7	5	5	7	7	7	7
2019-12-15 15:19:41	6	7	7	6	7	7	6	6	7	6	7	6	7	6	7	6	7	5	7	7	6	7	6	7	6	7	7	6	7	6	7	7	2	4	4	5	5	4	7	7	7	5	7	7	6	6	3	3	7
2019-12-15 15:21:33	7	5	6	6	7	6	5	7	6	7	7	6	5	7	5	6	7	7	6	5	6	7	5	6	7	5	7	7	5	7	7	6	7	6	7	7	5	5	6	7	5	7	7	6	7	7	1	5	7
2019-12-15 15:23:12	7	5	7	7	7	5	6	4	6	5	7	6	6	7	5	6	6	7	6	6	7	7	7	6	6	7	7	6	7	7	7	6	7	7	6	5	6	7	7	7	6	7	7	6	6	7	7	7	6
2019-12-15 15:25:03	6	7	7	6	6	6	7	5	7	7	7	5	7	5	7	6	6	7	5	7	7	6	7	7	7	5	7	7	7	7	5	7	6	5	6	7	7	7	7	7	7	7	5	6	7	7	3	2	7
2019-12-15 15:26:48	7	6	7	7	7	6	7	7	7	6	6	7	7	7	6	5	7	7	6	7	5	6	6	6	7	7	6	6	7	6	7	7	6	7	7	6	6	6	7	7	7	6	6	6	7	7	5	6	7
2019-12-15 16:54:03	6	7	6	7	6	6	6	7	5	6	6	6	7	5	5	6	7	7	6	7	7	6	6	6	5	6	5	6	7	6	5	6	6	7	6	6	5	5	7	6	7	7	6	6	6	7	7	7	6
2019-12-15 16:55:52	6	6	6	6	7	7	6	7	7	6	6	6	7	7	7	6	6	5	6	7	7	7	6	6	7	7	7	6	6	7	7	6	6	6	7	6	6	7	7	6	7	6	5	6	7	7	7	6	5
2019-12-15 17:31:57	6	7	6	6	7	6	6	6	6	7	6	7	6	6	6	7	5	7	7	5	6	7	7	7	6	5	7	7	7	7	6	6	7	7	7	7	7	7	6	7	7	6	4	5	7	7	5	5	5
2019-12-15 18:19:40	6	7	7	7	6	6	7	5	7	7	7	7	5	6	5	5	6	7	6	6	6	6	7	7	6	6	7	7	6	6	7	7	6	5	6	6	6	6	7	7	6	6	7	7	6	7	4	5	7
2019-12-15 18:29:25	5	6	7	7	7	6	6	7	6	6	7	6	6	7	5	6	6	7	7	7	5	7	7	6	7	7	5	7	7	7	6	6	7	5	6	6	6	7	7	7	6	4	5	7	6	7	6	5	7
[truncated: 11 more columns]
